# Supplementary material for: Optimisation of Protein Extraction from Medicinal Cannabis Mature Buds for Bottom-Up Proteomics
Source: MDPI journal article supplement (doi:10.3390/molecules24040659), 2019-02-13

Supplementary Figure S1: LC-MS maps of intact proteins.

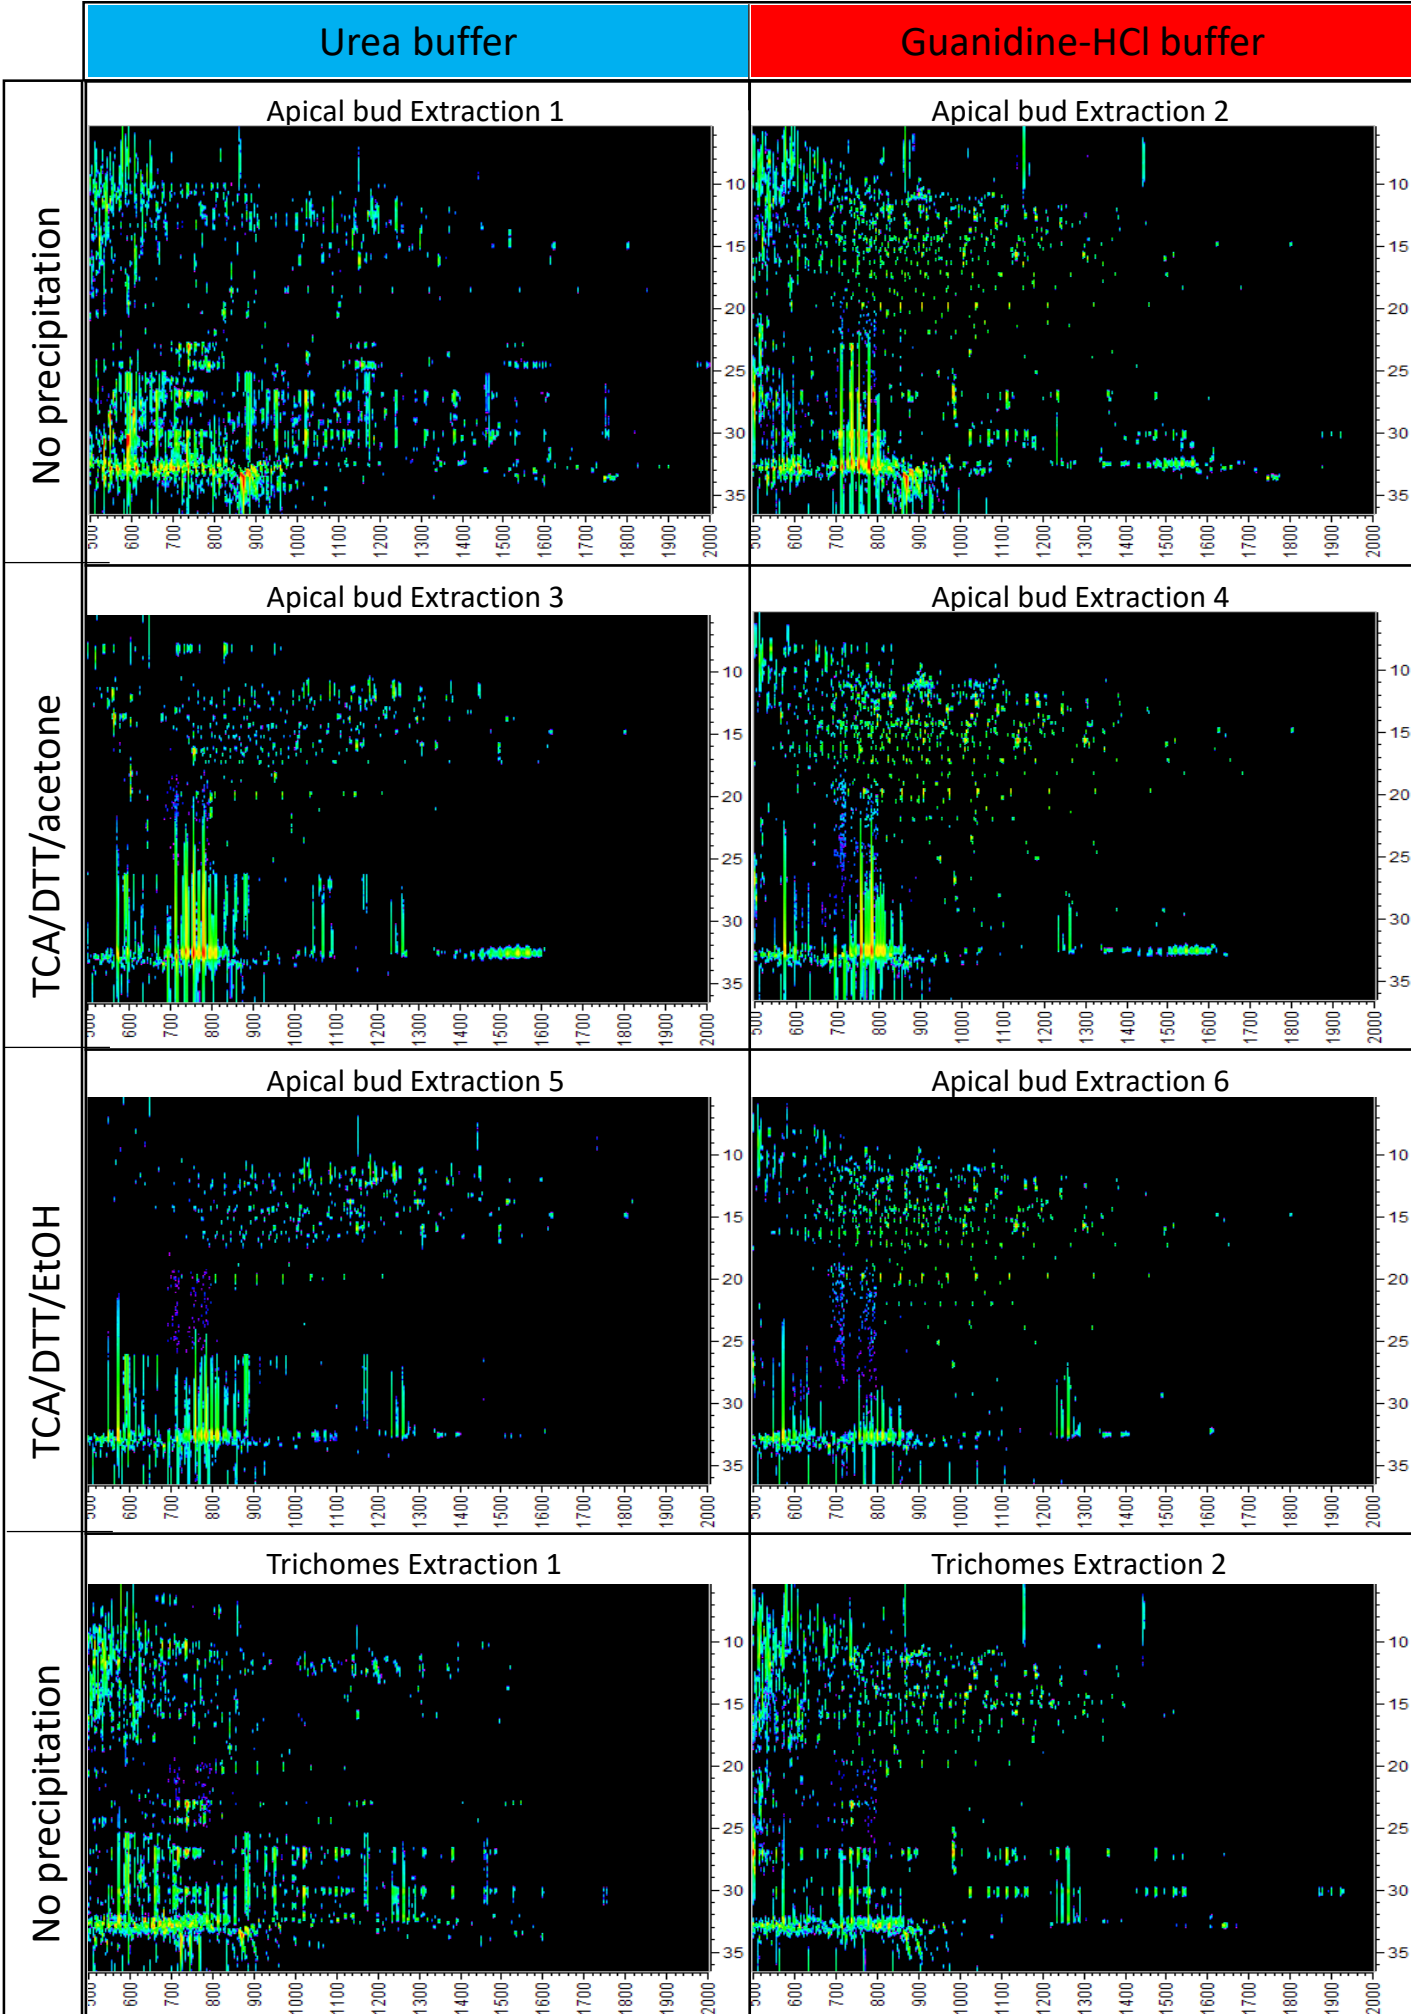

Supplementary Figure S2: nLC-MS maps of tryptic peptides.

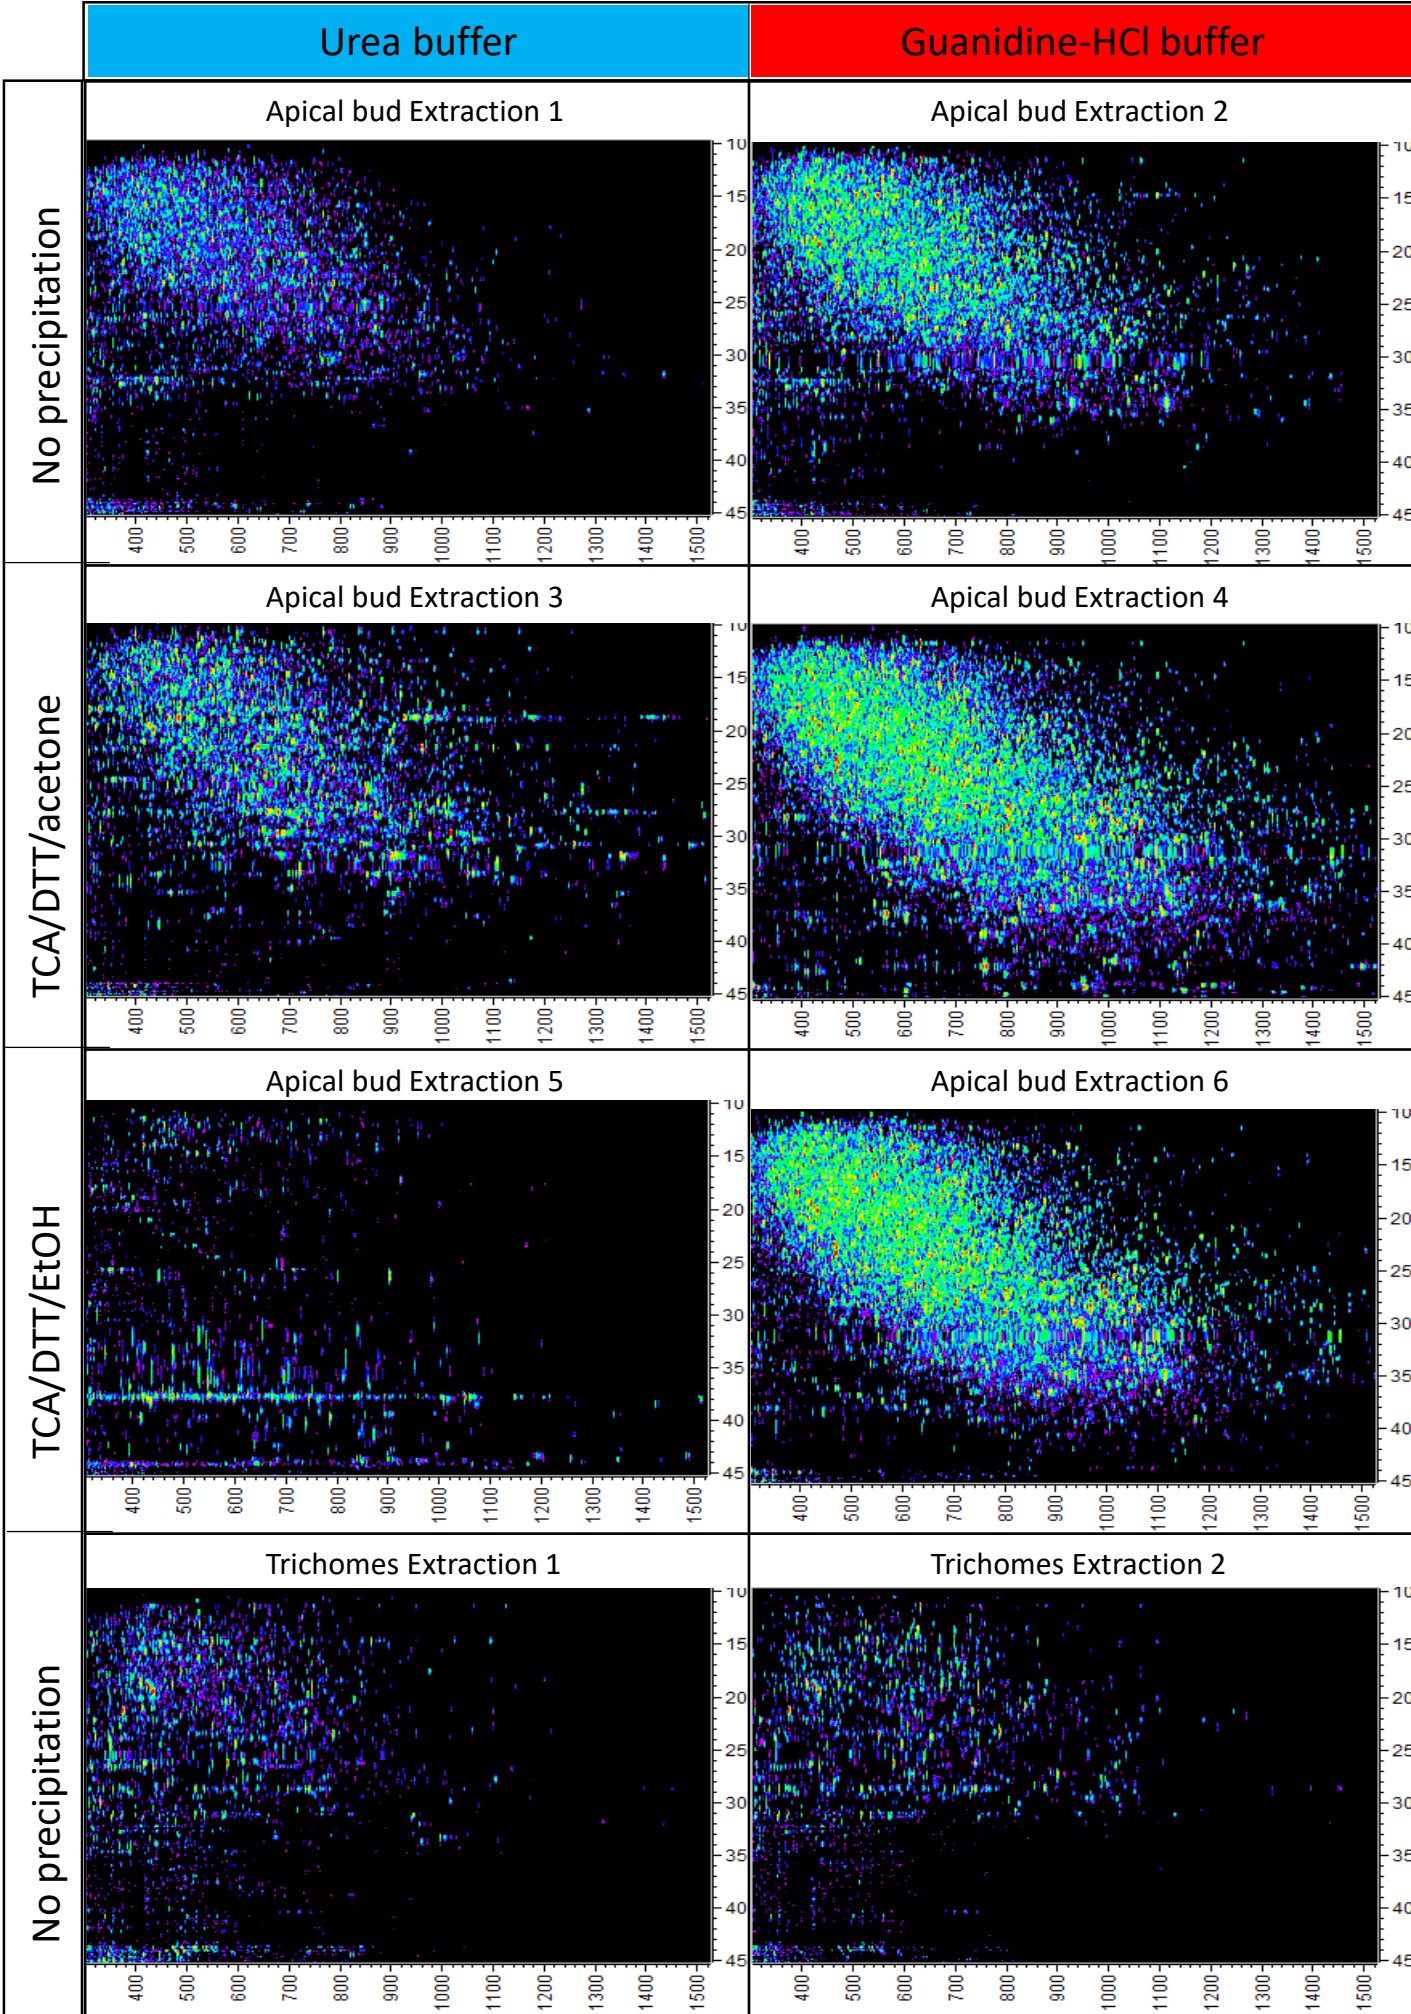

**Supplementary Figure S3: Distribution of Cannabis sativa entries in UniprotKB from 1986 to 2018.**

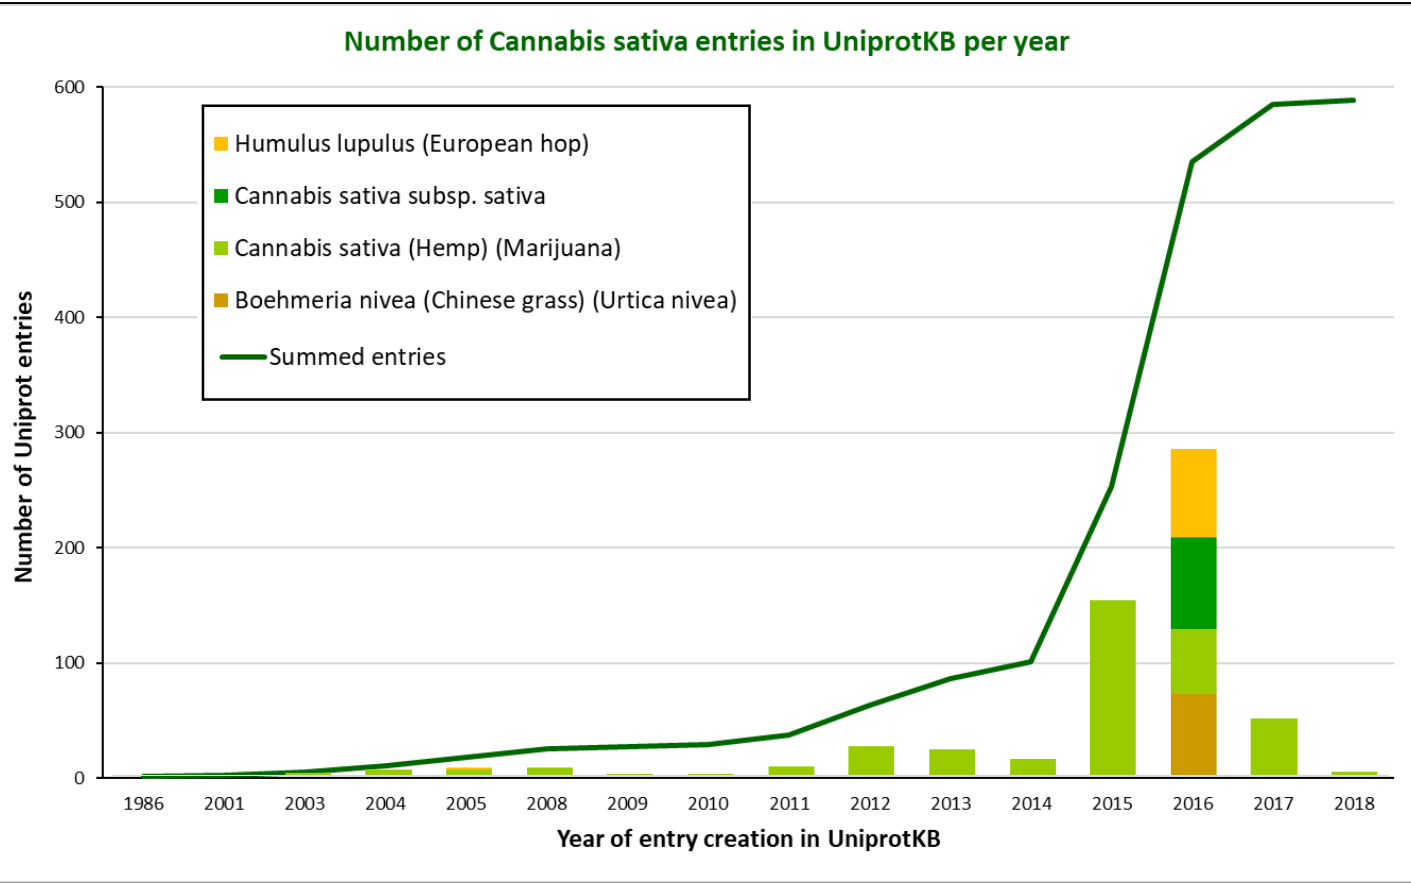

**Supplementary Figure S4: Quantitative comparison of the six extraction methods.**

Values obtained number of intact proteins quantified by UPLC-MS and number of tryptic peptides identified by nLC-MS/MS were converted into percent and coefficient of variation (CV). Resulting percentages are plotted in the histogram below and vertical bars denote CVs.

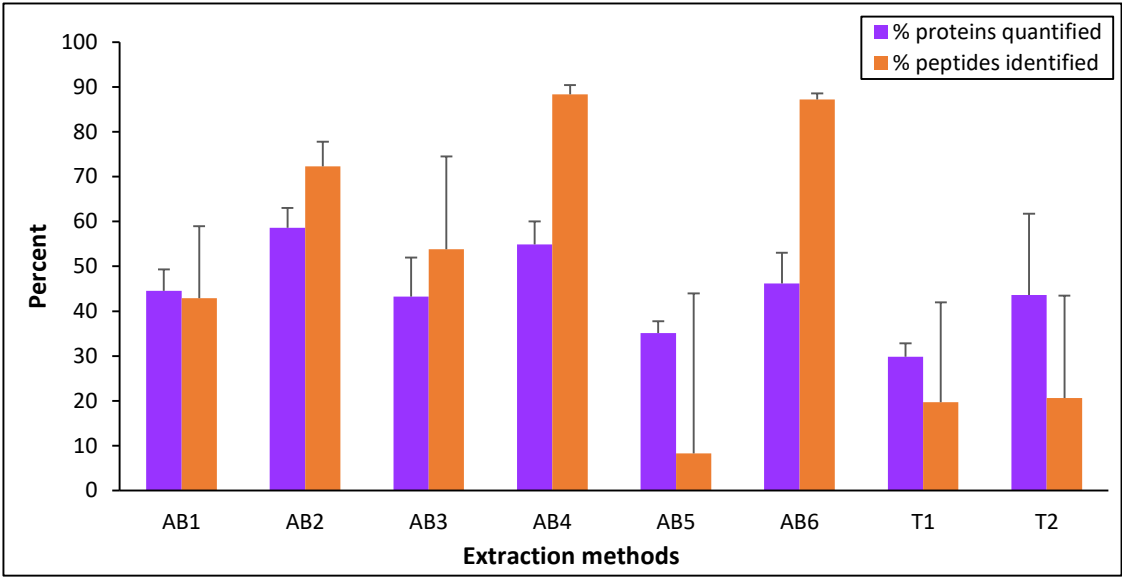

Supplement: s1 [file s1]
