# Supplementary material for: Optimisation of Protein Extraction from Medicinal Cannabis Mature Buds for Bottom-Up Proteomics
Source: Molecules. 2019 Feb 13;24(4):659. doi: 10.3390/molecules24040659 (PMC6412734; doi:10.3390/molecules24040659)
Supplement: Supplementary file 1 [file molecules-24-00659-s001.zip]

Archive with 4 entries (4 files):
- MC_protein optimisation paper_Suppl-Table-1.xlsx
- MC_protein optimisation paper_Suppl-Table-2.xlsx
- MC_protein optimisation paper_Suppl-Table-3.xlsx
- MC_protein optimisation paper_SupplFig-S1-S4.pdf
