# Supplementary material for: Optimisation of Protein Extraction from Medicinal Cannabis Mature Buds for Bottom-Up Proteomics
Source: Molecules. 2019 Feb 13;24(4):659. doi: 10.3390/molecules24040659 (PMC6412734; doi:10.3390/molecules24040659)
Supplement: Supplementary file 1 [file molecules-24-00659-s001.zip › MC_protein optimisation paper_Suppl-Table-1.xlsx]

## Sheet: BSA identification
Supplementary Table S1: Bottom-up identification results for Bovine Serum Albumin (BSA) sample (two injection replicates).
							BSA replicate 1 (A2 in orange)				BSA replicate 2 (B2 in blue)
Accession	Description	ΣCoverage	Σ# Proteins	Σ# Unique Peptides	Σ# Peptides	Σ# PSMs	Score A2	Coverage A2	# Peptides A2	# PSM A2	Score B2	Coverage B2	# Peptides B2	# PSM B2	# AAs	MW [kDa]	calc. pI
P02769	Serum albumin OS=Bos taurus OX=9913 GN=ALB PE=1 SV=4 - [ALBU_BOVIN]	75.12	1	51	51	2136	3091.16	74.46	50	1174	2850.06	68.2	43	962	607	69.2484	6.17627
	Sequence	# PSMs	# Proteins	# Protein Groups	Protein Group Accessions	Modifications	MH+ [Da]	A2	XCorr A2	Probability A2	SpScore A2	B2	XCorr B2	Probability B2	SpScore B2	# Missed Cleavages	ΔScore A2	ΔCn A2	Rank A2	Search Engine Rank A2	Charge A2	m/z [Da] A2	RT A2	ΔScore B2	ΔCn B2	Rank B2	Search Engine Rank B2	Charge B2	m/z [Da] B2	RT B2
	CCAADDKEACFAVEGPK	13	1	1	P02769	N-Term(Gln->pyro-Glu); C1(Carbamidomethyl); C2(Carbamidomethyl); C10(Carbamidomethyl)	1910.78	High	5.62751	0	2886.72	High	4.19687	0	1511.33	1	1	0	1	1	3	637.598	21.3072	1	0	1	1	2	955.899	22.1271
	CCAADDKEACFAVEGPK	20	1	1	P02769	C1(Carbamidomethyl); C2(Carbamidomethyl); C10(Carbamidomethyl)	1927.82	High	5.05717	0	2577.25	High	5.14046	0	1226.44	1	1	0	1	1	2	964.408	17.7267	1	0	1	1	3	643.277	18.1364
	LFTFHADICTLPDTEK	93	1	1	P02769	C9(Carbamidomethyl)	1907.92	High	4.84184	0	1736.75	High	5.33483	0	1701.74	0	1	0	1	1	2	954.467	26.1785	1	0	1	1	2	954.466	25.6033
	LGEYGFQNALIVR	10	1	1	P02769	N8(Deamidated)	1480.79	High	4.73626	0	1691.05	High	4.50053	0	1647.79	0	0.0021	0	1	1	2	740.897	28.2496	0.0067	0	1	1	2	740.896	28.0578
	MPCTEDYLSLILNR	162	1	1	P02769	C3(Carbamidomethyl)	1724.84	High	4.5261	0	2147.99	High	4.45071	0	2041.48	0	1	0	1	1	2	862.923	33.1477	1	0	1	1	2	862.925	32.2583
	SLHTLFGDELCK	71	1	1	P02769	C11(Carbamidomethyl)	1419.7	High	4.48919	0	1597.78	High	4.72438	0	1566.53	0	1	0	1	1	3	473.904	24.2979	1	0	1	1	3	473.905	23.4023
	YNGVFQECCQAEDK	13	1	1	P02769	C8(Carbamidomethyl); C9(Carbamidomethyl)	1747.71	High	4.34592	0	756.689	High	2.90364	0	465.32	0	1	0	1	1	3	583.242	18.5253	1	0	1	1	2	874.359	24.1699
	RHPEYAVSVLLR	89	1	1	P02769		1439.81	High	4.23847	0	1589.88	High	4.07119	0	1916.53	1	1	0	1	1	3	480.61	20.0155	1	0	1	1	3	480.614	21.0478
	YNGVFQECCQAEDK	23	1	1	P02769	N-Term(Gln->pyro-Glu); C8(Carbamidomethyl); C9(Carbamidomethyl)	1730.68	High	4.21102	0	995.523	High	4.31471	0	781.809	0	1	0	1	1	2	865.845	23.7262	1	0	1	1	2	865.844	24.4523
	HPYFYAPELLYYANK	40	1	1	P02769		1888.93	High	4.16154	0	1065.18	High	4.45219	0	1765.35	0	1	0	1	1	2	944.968	28.1416	1	0	1	1	3	630.313	29.4476
	RPCFSALTPDETYVPK	60	1	1	P02769	C3(Carbamidomethyl)	1880.93	High	4.1066	0	530.324	High	3.65004	0	394.535	0	1	0	1	1	4	470.987	22.1205	1	0	1	1	4	470.99	22.4611
	TCVADESHAGCEK	41	1	1	P02769	C2(Carbamidomethyl); C11(Carbamidomethyl)	1463.59	High	4.06935	0	1329.4	High	4.05284	0	1133.49	0	1	0	1	1	2	732.301	10.3107	1	0	1	1	2	732.299	12.0845
	QEPERNECFLSHK	27	1	1	P02769	N-Term(Gln->pyro-Glu); C8(Carbamidomethyl)	1656.76	High	4.05408	0	1260.66	High	3.97759	0	1204.49	1	1	0	1	1	3	552.924	13.8826	1	0	1	1	3	552.923	14.1029
	LGEYGFQNALIVR	119	1	1	P02769		1479.79	High	4.0312	0	648.537	High	4.28935	0	1580.04	0	1	0	1	1	2	740.404	47.0927	1	0	1	1	3	493.936	26.8251
	KVPQVSTPTLVEVSR	37	1	1	P02769		1639.94	High	4.0047	0	1255.14	High	3.64755	0	1250.06	1	1	0	1	1	3	547.319	21.8168	1	0	1	1	3	547.323	21.1017
	DAFLGSFLYEYSR	129	1	1	P02769		1567.75	High	3.99553	0	1751.09	High	4.23513	0	1265.8	0	1	0	1	1	3	523.254	33.2685	1	0	1	1	2	784.379	42.1772
	NECFLSHKDDSPDLPK	18	1	1	P02769	C3(Carbamidomethyl)	1901.88	High	3.96793	0	2132.09					1	1	0	1	1	2	951.442	18.2351
	MPCTEDYLSLILNR	39	1	1	P02769	M1(Oxidation); C3(Carbamidomethyl)	1740.83	High	3.90785	0	1548.13	High	4.10891	0	1685.28	0	1	0	1	1	2	870.921	31.5758	1	0	1	1	2	870.92	31.4238
	YNGVFQECCQAEDK	30	1	1	P02769	N2(Deamidated); C8(Carbamidomethyl); C9(Carbamidomethyl)	1748.7	High	3.85974	0	1364.99	High	4.3713	0	948.54	0	0.1451	0	1	1	2	874.852	19.2921	0.0114	0	1	1	2	874.857	20.5735
	YICDNQDTISSK	14	1	1	P02769	C3(Carbamidomethyl); N5(Deamidated)	1444.64	High	3.79852	0	920.949	High	3.83566	0	1100.84	0	0.0026	0	1	1	2	722.822	16.6667	0.0469	0	1	1	2	722.82	16.6806
	TVMENFVAFVDK	152	1	1	P02769		1399.7	High	3.74548	0	958.599	High	3.67169	0	937.021	0	1	0	1	1	2	700.352	32.645	1	0	1	1	2	700.352	31.9642
	ECCHGDLLECADDR	24	1	1	P02769	C2(Carbamidomethyl); C3(Carbamidomethyl); C10(Carbamidomethyl)	1749.67	High	3.72159	0	1289.71	High	4.01533	0	1391.9	0	1	0	1	1	2	875.339	17.9141	1	0	1	1	2	875.341	17.1257
	QEPERNECFLSHK	14	1	1	P02769	N6(Deamidated); C8(Carbamidomethyl)	1674.77	High	3.62345	0	588.496	High	3.35996	0	476.171	1	0.1133	0	1	1	2	837.887	15.0384	0.1042	0	1	1	2	837.884	15.0727
	YICDNQDTISSK	16	1	1	P02769	C3(Carbamidomethyl)	1443.65	High	3.5886	0	677.982	High	3.78574	0	1133.57	0	1	0	1	1	2	722.329	15.9764	1	0	1	1	2	722.326	15.2894
	TVMENFVAFVDK	13	1	1	P02769	N5(Deamidated)	1400.68	High	3.57642	0	1135.94	High	3.79575	0	1069.67	0	1	0	1	1	2	700.844	29.3861	1	0	1	1	2	700.843	32.1439
	HLVDEPQNLIK	12	1	1	P02769	N8(Deamidated)	1306.7	High	3.57445	0	738.41	High	3.49747	0	724.463	0	0.0084	0	1	1	2	653.856	20.6491	0.0086	0	1	1	2	653.86	20.381
	EYEATLEECCAK	15	1	1	P02769	C9(Carbamidomethyl); C10(Carbamidomethyl)	1502.63	High	3.49711	0	756.456	High	3.61473	0	1035.93	0	1	0	1	1	2	751.814	18.3514	1	0	1	1	2	751.818	17.2367
	YICDNQDTISSKLK	8	1	1	P02769	C3(Carbamidomethyl)	1684.83	High	3.46964	0	1038.5	High	3.53303	0	1075.55	1	1	0	1	1	2	842.918	16.9584	1	0	1	1	2	842.92	17.0291
	LVNELTEFAK	8	1	1	P02769	N3(Deamidated)	1164.62	High	3.42997	0	530.586	High	3.38303	0	538.262	0	1	0	1	1	2	582.813	24.8316	1	0	1	1	2	582.812	24.9211
	LVNELTEFAK	91	1	1	P02769		1163.64	High	3.41966	0	600.766	High	3.22003	0	623.213	0	1	0	1	1	2	582.322	24.4174	1	0	1	1	2	582.321	24.2132
	LKECCDKPLLEK	71	1	1	P02769	C4(Carbamidomethyl); C5(Carbamidomethyl)	1532.79	High	3.40663	0	1478.05	High	3.95448	0	1214.29	1	1	0	1	1	2	766.897	13.9356	1	0	1	1	2	766.897	15.1963
	LKPDPNTLCDEFK	21	1	1	P02769	C9(Carbamidomethyl)	1576.77	High	3.37869	0	608.71	High	2.11387	0	226.009	0	1	0	1	1	3	526.263	21.8059	1	0	1	1	2	788.895	23.3136
	VPQVSTPTLVEVSR	14	1	1	P02769		1511.85	High	3.36706	0	1035.24	High	3.27846	0	1264.84	0	1	0	1	1	2	756.428	22.8175	1	0	1	1	2	756.432	22.9446
	KQTALVELLK	25	1	1	P02769		1142.72	High	3.33072	0	636.91	High	2.35938	0	701.862	1	1	0	1	1	3	381.577	20.8775	1	0	1	1	2	571.865	23.2679
	NECFLSHKDDSPDLPK	3	1	1	P02769	N1(Deamidated); C3(Carbamidomethyl)	1902.86	High	3.32601	0	1408.32	High	1.76712	0	40.375	1	1	0	1	1	2	951.935	19.7056	1	0	1	1	2	951.939	35.7051
	LKPDPNTLCDEFK	6	1	1	P02769	N6(Deamidated); C9(Carbamidomethyl)	1577.77	High	3.31647	0	1357.16	High	3.34304	0	1124.45	0	1	0	1	1	3	526.59	20.2022	1	0	1	1	3	526.594	20.223
	LKHLVDEPQNLIK	1	1	1	P02769		1546.9	High	3.28633	0	828.896					1	1	0	1	1	3	516.305	18.746
	HLVDEPQNLIK	92	1	1	P02769		1305.72	High	3.24668	0	742.716	High	3.00847	0	662.931	0	1	0	1	1	2	653.364	19.6864	1	0	1	1	2	653.363	24.4611
	TVMENFVAFVDK	47	1	1	P02769	M3(Oxidation)	1415.69	High	3.23671	0	1006.83	High	3.48685	0	803.441	0	1	0	1	1	2	708.35	29.329	1	0	1	1	2	708.349	29.6181
	FKDLGEEHFK	70	1	1	P02769		1249.62	High	3.1571	0	1247.6	High	3.69934	0	1190.49	1	1	0	1	1	3	417.214	16.1414	1	0	1	1	3	417.213	15.1764
	YNGVFQECCQAEDK	6	1	1	P02769	N2(Deamidated); Q6(Deamidated); C8(Carbamidomethyl); C9(Carbamidomethyl)	1749.67	High	3.10581	0	731.023	High	2.78953	0	707.551	0	0.1093	0	1	1	3	583.893	18.3579	0.0932	0	1	1	3	583.898	18.4273
	ETYGDMADCCEK	16	1	1	P02769	M6(Oxidation); C9(Carbamidomethyl); C10(Carbamidomethyl)	1494.52	High	3.06087	0	790.553	High	3.05781	0	663.718	0	1	0	1	1	2	747.766	12.6805	1	0	1	1	2	747.765	12.8416
	KQTALVELLK	7	1	1	P02769	N-Term(Gln->pyro-Glu)	1125.7	High	3.02429	0	584.083	High	3.20161	0	567.627	1	1	0	1	1	2	563.349	21.2607	1	0	1	1	2	563.353	21.1124
	HPEYAVSVLLR	23	1	1	P02769		1283.72	High	3.02247	0	683.492	High	3.2021	0	720.931	0	1	0	1	1	3	428.576	22.5955	1	0	1	1	3	428.579	22.5541
	NECFLSHKDDSPDLPK	2	1	1	P02769	N-Term(Gln->pyro-Glu); C3(Carbamidomethyl)	1884.85	High	3.01555	0	488.697					1	1	0	1	1	3	628.956	18.1355
	LGEYGFQNALIVR	3	1	1	P02769	N-Term(Gln->pyro-Glu)	1462.78	High	3.00899	0	1272.79					0	1	0	1	1	2	731.893	27.1313
	ETYGDMADCCEK	16	1	1	P02769	C9(Carbamidomethyl); C10(Carbamidomethyl)	1478.53	High	2.90129	0	881.651	High	3.13215	0	1045.76	0	1	0	1	1	2	739.769	15.8509	1	0	1	1	2	739.769	16.3223
	CCTESLVNR	16	1	1	P02769	C1(Carbamidomethyl); C2(Carbamidomethyl)	1138.5	High	2.79178	0	791.133	High	3.02295	0	769.687	0	1	0	1	1	2	569.755	14.2194	1	0	1	1	2	569.754	14.4328
	DDPHACYSTVFDK	22	1	1	P02769	C6(Carbamidomethyl)	1554.66	High	2.77957	0	359.987	High	2.72619	0	779.561	0	1	0	1	1	2	777.833	19.3461	1	0	1	1	3	518.894	19.2382
	HPYFYAPELLYYANK	6	1	1	P02769	N-Term(Gln->pyro-Glu); Y5(Phospho); N14(Deamidated)	1952.85	High	2.71031	0	218.812	High	2.05089	0	152.064	0	0.0148	0	1	1	2	976.927	28.2237	0.0049	0	1	1	2	976.923	28.4203
	CCTESLVNR	4	1	1	P02769	N-Term(Gln->pyro-Glu); C1(Carbamidomethyl); C2(Carbamidomethyl)	1121.48	High	2.70022	0	1009.39					0	1	0	1	1	2	561.241	19.8513
	QEPERNECFLSHK	21	1	1	P02769	C8(Carbamidomethyl)	1673.77	High	2.5437	0	351.403	High	2.8707	0	364.805	1	1	0	1	1	2	837.393	14.6336	1	0	1	1	2	837.389	15.2644
	ECCDKPLLEK	26	1	1	P02769	C2(Carbamidomethyl); C3(Carbamidomethyl)	1291.61	High	2.52174	0	303.364	High	2.59805	0	172.962	0	1	0	1	1	2	646.307	13.595	1	0	1	1	2	646.306	14.3853
	CCTKPESER	16	1	1	P02769	N-Term(Gln->pyro-Glu); C1(Carbamidomethyl); C2(Carbamidomethyl)	1149.47	High	2.48523	0	332.702	High	2.63445	0	415.459	0	1	0	1	1	2	575.24	11.1988	1	0	1	1	2	575.239	11.3368
	CCTKPESER	2	1	1	P02769	C1(Carbamidomethyl); C2(Carbamidomethyl)	1166.5	High	2.46658	0	384.117	High	2.71934	0	446.566	0	1	0	1	1	2	583.753	8.40689	1	0	1	1	2	583.752	8.44265
	AEFVEVTK	15	1	1	P02769		922.494	High	2.4148	0	381.105	High	2.46484	0	370.613	0	1	0	1	1	2	461.75	17.6773	1	0	1	1	2	461.75	16.859
	HPYFYAPELLYYANK	4	1	1	P02769	N-Term(Gln->pyro-Glu)	1871.9	High	2.40184	0	411.744	High	2.48511	0	327.157	0	1	0	1	1	2	936.459	29.4175	1	0	1	1	2	936.454	29.2986
	QNCDQFEK	10	1	1	P02769	N-Term(Gln->pyro-Glu); C3(Carbamidomethyl)	1051.42	High	2.36274	0	665.826	High	2.51404	0	648.289	0	1	0	1	1	2	526.214	15.5768	1	0	1	1	2	526.212	16.039
	EACFAVEGPK	3	1	1	P02769	C3(Carbamidomethyl)	1107.52	High	2.31349	0	665.661					0	1	0	1	1	2	554.263	18.0689
	YICDNQDTISSK	4	1	1	P02769	N-Term(Gln->pyro-Glu); C3(Carbamidomethyl)	1426.62	High	2.31286	0	659.171	High	2.01945	0	384.571	0	1	0	1	1	2	713.815	15.4227	1	0	1	1	2	713.815	15.3114
	DAIPENLPPLTADFAEDK	9	1	1	P02769		1955.96	High	2.306	0	250.393	High	2.62399	0	384.172	0	1	0	1	1	2	978.486	29.626	1	0	1	1	2	978.483	29.2601
	TVMENFVAFVDK	4	1	1	P02769	N-Term(Gln->pyro-Glu)	1382.67	High	2.26897	0	504.624	High	2.99123	0	652.351	0	1	0	1	1	2	691.839	30.7559	1	0	1	1	2	691.838	30.5973
	CCTESLVNR	2	1	1	P02769	C1(Carbamidomethyl); C2(Carbamidomethyl); N8(Deamidated)	1139.48	High	2.25688	0	723.027	High	2.22939	0	703.322	0	1	0	1	1	2	570.245	16.1059	1	0	1	1	2	570.246	16.3397
	LVVSTQTALA	11	1	1	P02769		1002.59	High	2.23852	0	310.574	High	2.18674	0	320.262	0	1	0	1	1	2	501.797	22.4196	1	0	1	1	2	501.799	22.7796
	SHCIAEVEK	11	1	1	P02769	C3(Carbamidomethyl)	1072.51	High	2.21022	0	358.705	High	2.2934	0	500.877	0	1	0	1	1	2	536.76	12.4064	1	0	1	1	2	536.759	12.2589
	NECFLSHK	9	1	1	P02769	C3(Carbamidomethyl)	1034.47	High	2.17822	0	471.923	High	2.25769	0	496.073	0	1	0	1	1	2	517.741	13.887	1	0	1	1	2	517.74	13.9833
	LVNELTEFAK	11	1	1	P02769	N-Term(Gln->pyro-Glu)	1146.61	High	2.17426	0	323.818	High	2.26687	0	268.016	0	1	0	1	1	2	573.807	23.6143	1	0	1	1	2	573.808	23.6919
	LGEYGFQNALIVR	4	1	1	P02769	N-Term(Gln->pyro-Glu); Y4(Phospho); Q7(Deamidated); N8(Deamidated)	1544.72	High	2.15719	0	299.148	High	2.83538	0	502.188	0	1	0	1	1	2	772.863	27.027	1	0	1	1	3	515.577	27.0096
	YICDNQDTISSK	1	1	1	P02769	N-Term(Gln->pyro-Glu); C3(Carbamidomethyl); N5(Deamidated); Q6(Deamidated); T8(Phospho)	1508.55	High	2.14516	0	266.29					0	1	0	1	1	2	754.779	16.3497
	NECFLSHK	11	1	1	P02769	N1(Deamidated); C3(Carbamidomethyl)	1035.46	High	2.07513	0	555.655	High	2.20138	0	595.849	0	1	0	1	1	2	518.234	15.6582	1	0	1	1	2	518.233	15.936
	YLYEIAR	13	1	1	P02769		927.496	High	2.05825	0	216.167					0	1	0	1	1	2	464.252	20.4069
	SEIAHR	1	1	1	P02769		712.377	High	1.94027	0	308.199					0	1	0	1	1	2	356.692	8.38565
	DDSPDLPK	12	1	1	P02769		886.417	High	1.93071	0	290.987	High	2.01875	0	354.087	0	1	0	1	1	2	443.713	15.7019	1	0	1	1	2	443.712	16.1715
	LSQKFPK	3	1	1	P02769		847.507	High	1.89702	0	266.31					1	1	0	1	1	2	424.257	12.6141
	NECFLSHK	1	1	1	P02769	N-Term(Gln->pyro-Glu); C3(Carbamidomethyl)	1017.45	High	1.83309	0	431.31					0	1	0	1	1	2	509.229	13.3803
	DLGEEHFK	12	1	1	P02769		974.458	High	1.78563	0	345.168	High	1.92743	0	352.442	0	1	0	1	1	2	487.735	15.3579	1	0	1	1	2	487.733	15.637
	QTALVELLK	4	1	1	P02769	N-Term(Gln->pyro-Glu)	997.592	High	1.77972	0	293.749	High	1.82691	0	274.745	0	1	0	1	1	2	499.301	32.922	1	0	1	1	2	499.299	32.7821
	GACLLPK	5	1	1	P02769	C3(Carbamidomethyl)	758.427	High	1.7524	0	307.203					0	1	0	1	1	2	379.717	16.3143
	QNCDQFEK	11	1	1	P02769	N2(Deamidated); C3(Carbamidomethyl)	1069.43	High	1.72817	0	270.22	High	2.12218	0	267.718	0	0.0347	0	1	1	2	535.218	12.6826	0.033	0	1	1	2	535.217	12.7709
	LCVLHEK	11	1	1	P02769	C2(Carbamidomethyl)	898.482	High	1.67708	0	424.15	High	1.77317	0	395.952	0	1	0	1	1	2	449.746	12.9436	1	0	1	1	2	449.745	13.3644
	YLYEIAR	1	1	1	P02769	N-Term(Gln->pyro-Glu)	910.466	High	1.63135	0	402.241					0	1	0	1	1	2	455.736	20.3372
	LVTDLTK	6	1	1	P02769		789.475	High	1.61924	0	182.568					0	1	0	1	1	2	395.241	16.7831
	HPYFYAPELLYYANK	1	1	1	P02769	N14(Deamidated)	1889.93	High	1.60646	0	237.226					0	1	0	1	1	2	945.468	29.2165
	CASIQK	1	1	1	P02769	C1(Carbamidomethyl)	706.359	High	1.57941	0	117.045					0	1	0	1	1	2	353.683	8.72151
	HPEYAVSVLLR	1	1	1	P02769	N-Term(Gln->pyro-Glu)	1266.7	High	1.57504	0	122.301					0	1	0	1	1	2	633.852	23.5886
	QTALVELLK	2	1	1	P02769		1014.62	High	1.48087	0	258.189					0	1	0	1	1	2	507.815	26.1935
	VGTRCCTKPESER	3	1	1	P02769	C5(Carbamidomethyl); C6(Carbamidomethyl)	1579.73					High	2.36475	0	216.178	1								1	0	1	1	2	790.369	12.2315
	LKECCDKPLLEK	2	1	1	P02769	N-Term(Gln->pyro-Glu); C4(Carbamidomethyl); C5(Carbamidomethyl)	1515.76					High	2.32093	0	253.109	1								1	0	1	1	3	505.924	14.0614
