# Supplementary material for: Optimisation of Protein Extraction from Medicinal Cannabis Mature Buds for Bottom-Up Proteomics
Source: Molecules. 2019 Feb 13;24(4):659. doi: 10.3390/molecules24040659 (PMC6412734; doi:10.3390/molecules24040659)
Supplement: Supplementary file 1 [file molecules-24-00659-s001.zip › MC_protein optimisation paper_Suppl-Table-2.xlsx]

## Sheet: Sheet1
Supplementary Table S2: Number of nLC-MS peaks detected and clusters quantified in Genedata Expressionist Refiner across the various extraction methods.
		Number of nLC-MS peaks			Number of nLC-MS clusters
Extraction method	Average	SD (n=6)	CV (%)	Average	SD (n=6)	CV (%)
AB1	8484.33	2150.75	25.3497	6964.67	1661.86	23.8613
AB2	23952	4262.78	17.7972	15911.7	2333.77	14.667
AB3	18883.7	1716.94	9.09217	13628.3	1478.46	10.8485
AB4	55443.3	4094.34	7.38473	31126.3	1446.01	4.64561
AB5	2537.33	559.818	22.0632	1988	449.865	22.629
AB6	59084.3	6292.54	10.6501	32308.7	2381.83	7.37211
T1	3117.67	851.305	27.3059	2663.33	727.865	27.3291
T2	3007.67	559.077	18.5884	2311	359.448	15.5538
ratio AB1:T1	2.72137			2.61502
ratio AB2:T2	7.96365			6.88519
