# Supplementary material for: Optimisation of Protein Extraction from Medicinal Cannabis Mature Buds for Bottom-Up Proteomics
Source: Molecules. 2019 Feb 13;24(4):659. doi: 10.3390/molecules24040659 (PMC6412734; doi:10.3390/molecules24040659)
Supplement: Supplementary file 1 [file molecules-24-00659-s001.zip › MC_protein optimisation paper_Suppl-Table-3.xlsx]

## Sheet: List of peptides identified
Supplementary Table S3: List of peptides and proteins identified in cannabis apical buds and trichomes by bottom-up proteomics.
Row	Cluster Size	Charge	Mass	m/z	RT	Accession	Protein annotation	Abbreviation	Species	Unique Peptide	Length	Missed Cleavages	Ion Matches	XCorr
Cluster_41082	2	2	1544.8	773.408	20.321	A7IZZ1	(-)-limonene synthase, chloroplastic	TPS1	Cannabis sativa	LADDLGTLSDELKR	14	1	6	1.53
Cluster_40992	3	2	1524.82	763.416	25.8314	A7IZZ1	(-)-limonene synthase, chloroplastic	TPS1	Cannabis sativa	FENEIISILKEK	12	1	11	1.61074
Cluster_41203	5	2	1569.68	785.848	38.3528	[Glu1]-Fibrinopeptide B	[Glu1]-Fibrinopeptide B_internal standard	IS	Homo sapiens sapiens	EGVNDNEEGFFSAR	14	0	19	3.9387
Cluster_39387	4	2	1228.66	615.338	11.2992	B1Q2B6	3,5,7-trioxododecanoyl-CoA synthase	OLS	Cannabis sativa	SEHMTQLKEK	10	1	8	1.87206
Cluster_38409	3	2	1055.58	528.799	15.0324	B1Q2B6	3,5,7-trioxododecanoyl-CoA synthase	OLS	Cannabis sativa	AIKEWGQPK	9	1	9	1.70927
Cluster_38306	5	2	1038.66	520.336	23.3854	B1Q2B6	3,5,7-trioxododecanoyl-CoA synthase	OLS	Cannabis sativa	KVSPSLGLLK	10	1	9	1.5223
Cluster_39062	2	2	1171.59	586.804	21.6286	B1Q2B6	3,5,7-trioxododecanoyl-CoA synthase	OLS	Cannabis sativa	QDMLVVEVPK	10	0	11	2.23956
Cluster_40146	2	2	1371.71	686.863	37.9562	B1Q2B6	3,5,7-trioxododecanoyl-CoA synthase	OLS	Cannabis sativa	DVPMLISNNIEK	12	0	14	2.0363
Cluster_32945	3	3	1440.71	481.243	17.7382	B1Q2B6	3,5,7-trioxododecanoyl-CoA synthase	OLS	Cannabis sativa	LVEHEMQTLDAR	12	0	16	2.37067
Cluster_40538	5	2	1440.71	721.36	17.7428	B1Q2B6	3,5,7-trioxododecanoyl-CoA synthase	OLS	Cannabis sativa	LVEHEMQTLDAR	12	0	16	3.14163
Cluster_39533	2	2	1255.67	628.84	26.5114	A0A0C5APY5	30S ribosomal protein S12, chloroplastic	rps12	Cannabis sativa	SSALYGVKKPK	11	1	14	1.61269
Cluster_40603	4	2	1453.6	727.809	12.2835	A0A0C5B2L8	30S ribosomal protein S12, chloroplastic	rps12	Cannabis sativa	QQGRSSALYGVK	12	1	11	1.71173
Cluster_33282	2	3	1617.85	540.29	22.5611	A0A0U2DTI4	30S ribosomal protein S14, chloroplastic	rps14	Cannabis sativa subsp. sativa	ANYRDFGLSGHILR	14	1	20	3.06499
Cluster_24260	2	4	1617.85	405.469	22.578	A0A0U2DTI4	30S ribosomal protein S14, chloroplastic	rps14	Cannabis sativa subsp. sativa	ANYRDFGLSGHILR	14	1	22	1.82171
Cluster_41640	2	2	1674.94	838.478	35.9596	A0A0U2DW79	30S ribosomal protein S15, chloroplastic	rps15	Cannabis sativa subsp. sativa	IRYKELINQLDIR	13	2	8	1.6151
Cluster_42677	3	2	1981.93	991.971	25.9485	A0A0C5ART6	30S ribosomal protein S3, chloroplastic	rps3	Cannabis sativa	IINSPQKMEELQMNVK	16	1	9	1.74813
Cluster_42665	6	2	1979	990.508	26.0447	A0A0C5ART6	30S ribosomal protein S3, chloroplastic	rps3	Cannabis sativa	IINSPQKMEELQMNVK	16	1	11	1.695
Cluster_41186	4	2	1566.84	784.429	19.9569	A0A0C5ART6	30S ribosomal protein S3, chloroplastic	rps3	Cannabis sativa	IWEVRAIEKGDIR	13	2	12	1.58001
Cluster_42379	5	2	1883.84	942.929	31.4278	A0A0U2H5A0	30S ribosomal protein S4, chloroplastic	rps4	Humulus lupulus	KSKSLVQNYLDSSVR	15	2	14	1.84189
Cluster_42610	4	2	1958.98	980.5	23.9838	A0A0U2GZU5	30S ribosomal protein S8, chloroplastic	rps8	Humulus lupulus	RISRPGLRIYSNYQR	15	2	5	1.59822
Cluster_40149	3	2	1372.58	687.297	20.039	A0A0U2GZU5	30S ribosomal protein S8, chloroplastic	rps8	Humulus lupulus	IYSNYQRIPR	10	1	11	1.82482
Cluster_40721	2	2	1474.76	738.387	18.2617	A0A1V0QSF5	3-hydroxy-3-methylglutaryl coenzyme A reductase	hmgR	Cannabis sativa	LMNLEVLAEVNTK	13	0	7	1.56538
Cluster_39507	2	2	1251.62	626.818	32.5348	A0A1V0QSF5	3-hydroxy-3-methylglutaryl coenzyme A reductase	hmgR	Cannabis sativa	RSTKSGPAEPIK	12	2	7	1.52877
Cluster_42043	3	2	1783.78	892.897	32.0731	A0A1V0QSF5	3-hydroxy-3-methylglutaryl coenzyme A reductase	hmgR	Cannabis sativa	SVLDGKTPSYSLETK	15	1	11	1.94482
Cluster_42045	4	2	1783.79	892.9	40.2262	A0A1V0QSF5	3-hydroxy-3-methylglutaryl coenzyme A reductase	hmgR	Cannabis sativa	TELSYSPTKGDLVSK	15	1	14	1.59037
Cluster_33971	3	3	1913.83	638.949	13.1505	A0A1V0QSF5	3-hydroxy-3-methylglutaryl coenzyme A reductase	hmgR	Cannabis sativa	GCKAIHLSGGSFSVLLK	17	1	20	1.63589
Cluster_42507	2	2	1923.97	962.992	28.8686	A0A1V0QSG7	3-hydroxy-3-methylglutaryl coenzyme A reductase	hmgR	Cannabis sativa	SSRFARLQGIQCAIAGK	17	0.0430556	14	1.81502
Cluster_42631	6	2	1967	984.507	26.7898	A0A1V0QSG7	3-hydroxy-3-methylglutaryl coenzyme A reductase	hmgR	Cannabis sativa	GKSVVCEAVINEEVVKK	17	2	8	1.5558
Cluster_41504	4	2	1639.75	820.884	23.4471	A0A142EGJ1	4-coumarate:CoA ligase	4CL	Cannabis sativa	RISRVFFIDAIPK	13	2	10	1.53074
Cluster_42016	2	2	1774.79	888.401	34.3694	V5KXG5	4-coumarate:CoA ligase	4CL	Cannabis sativa	DITNKTSEPDNLYGK	15	1	8	1.6298
Cluster_39538	3	2	1255.77	628.89	20.7257	V5KXG5	4-coumarate:CoA ligase	4CL	Cannabis sativa	VGLKNLGSALKR	12	2	10	1.65745
Cluster_41267	5	2	1582.71	792.363	21.2368	V5KXG5	4-coumarate:CoA ligase	4CL	Cannabis sativa	QEQQQDIIFRSK	12	1	11	1.68898
Cluster_38654	6	2	1099.67	550.84	23.3139	V5KXG5	4-coumarate:CoA ligase	4CL	Cannabis sativa	LASGLNKLGVK	11	1	13	1.69205
Cluster_40081	3	2	1358.64	680.325	11.4756	A0A0C5AUJ2	50S ribosomal protein L16, chloroplastic	rpl16	Cannabis sativa	MPIRTQFIISG	11	1	11	1.64677
Cluster_33398	2	3	1670.7	557.906	15.1454	A0A0C5AUJ2	50S ribosomal protein L16, chloroplastic	rpl16	Cannabis sativa	GFCIRNGRYSIGK	13	2	17	1.5993
Cluster_42429	3	2	1900.87	951.441	23.1513	A0A0C5B2J3	50S ribosomal protein L20	rpl20	Cannabis sativa	LWITRLNAVIRDYK	14	2	14	1.54598
Cluster_38318	3	2	1040.55	521.281	19.4244	A0A0U2H0V8	50S ribosomal protein L20, chloroplastic	rpl20	Humulus lupulus	LNAVIRDNK	9	1	7	1.63347
Cluster_40413	3	2	1417.73	709.873	21.9806	A0A219D1T7	7S vicilin-like protein	Cs7S	Cannabis sativa	LLDSLFANRDKK	12	2	10	1.79503
Cluster_42101	3	2	1797.8	899.905	22.6052	A0A219D1T7	7S vicilin-like protein	Cs7S	Cannabis sativa	FGKKGDYLNYSDPSK	15	2	11	2.1393
Cluster_41257	2	2	1580.79	791.4	26.3191	A0A0U2DTG7	Acetyl-coenzyme A carboxylase carboxyl transferase subunit beta, chloroplastic	accD	Cannabis sativa subsp. sativa	KNSQYDYLASSIK	13	1	9	1.51068
Cluster_40695	4	2	1470.63	736.321	30.314	A0A0U2DTG7	Acetyl-coenzyme A carboxylase carboxyl transferase subunit beta, chloroplastic	accD	Cannabis sativa subsp. sativa	RESSNDLDVTQK	12	1	11	1.53852
Cluster_41708	3	2	1692.83	847.421	35.1314	A0A0U2DTG7	Acetyl-coenzyme A carboxylase carboxyl transferase subunit beta, chloroplastic	accD	Cannabis sativa	YKQTVDLDNSSERR	14	2	12	2.03335
Cluster_41980	5	2	1766.89	884.453	25.226	H9A1V3	Acyl-activating enzyme 1	aae1	Cannabis sativa	VTMLGVVPSIVRSWK	15	1	10	1.5128
Cluster_42611	4	2	1959.05	980.534	22.7406	H9A1W2	Acyl-activating enzyme 10	aae10	Cannabis sativa	KKAEAAPVIIASVAEGYDK	19	2	8	1.78789
Cluster_42012	2	2	1773.85	887.932	16.8217	H9A8L1	Acyl-activating enzyme 12	aae12	Cannabis sativa	ILRQQFTQLDKSSK	14	2	7	1.57094
Cluster_42014	3	2	1773.92	887.968	25.3348	H9A8L1	Acyl-activating enzyme 12	aae12	Cannabis sativa	ILRQQFTQLDKSSK	14	2	11	1.59538
Cluster_42281	5	2	1848.83	925.424	20.5702	H9A8L2	Acyl-activating enzyme 13	aae13	Cannabis sativa	EQVISVAKSLDAMFSK	16	1	8	1.53499
Cluster_39811	3	2	1307.64	654.829	15.8646	H9A8L2	Acyl-activating enzyme 13	aae13	Cannabis sativa	FLPNLNSQIAK	11	0	10	1.55596
Cluster_34083	2	3	1956.04	653.02	26.1234	H9A8L2	Acyl-activating enzyme 13	aae13	Cannabis sativa	VTAVKIVHEFPRTMSNK	17	2	14	1.63445
Cluster_40975	4	2	1521.69	761.853	20.6859	H9A1V4	Acyl-activating enzyme 2	aae2	Cannabis sativa	VLDRVYAGLTQK	12	1	7	1.55488
Cluster_38568	2	2	1085.55	543.782	12.7452	H9A1V4	Acyl-activating enzyme 2	aae2	Cannabis sativa	GAKGDVVERR	10	2	7	1.59161
Cluster_41556	2	2	1652.85	827.431	33.4304	H9A1V4	Acyl-activating enzyme 2	aae2	Cannabis sativa	VNGGLGQKVKSFVIK	15	2	10	1.67393
Cluster_40828	4	2	1495.8	748.908	31.4431	H9A1V5	Acyl-activating enzyme 3	aae3	Cannabis sativa	ISSLNFKKVMSNK	13	2	7	1.51
Cluster_41229	3	2	1573.92	787.968	36.9616	H9A1V5	Acyl-activating enzyme 3	aae3	Cannabis sativa	LIITVPQLLEKVK	13	1	9	1.51358
Cluster_40831	4	2	1496.78	749.395	28.5396	H9A1V5	Acyl-activating enzyme 3	aae3	Cannabis sativa	NSMVKKFNLSSIK	13	2	10	2.12458
Cluster_41154	2	2	1560.71	781.364	30.4877	H9A1V5	Acyl-activating enzyme 3	aae3	Cannabis sativa	LRKVTFINSVPK	12	2	11	1.63778
Cluster_40931	2	2	1513.77	757.89	21.9904	H9A1V5	Acyl-activating enzyme 3	aae3	Cannabis sativa	GSASKPVSNIFTVK	14	0	12	1.65839
Cluster_41746	6	2	1701.72	851.867	20.492	H9A1V5	Acyl-activating enzyme 3	aae3	Cannabis sativa	KVTFINSVPKSASGK	15	2	13	1.70397
Cluster_42672	7	2	1980.99	991.505	26.9671	H9A1V5	Acyl-activating enzyme 3	aae3	Cannabis sativa	LMKELDFRAMSIVTNGR	17	2	14	2.76907
Cluster_42067	4	2	1787.99	895.002	23.3937	H9A1V6	Acyl-activating enzyme 4	aae4	Cannabis sativa	VLRDQIKHELSAHSR	15	2	7	1.62037
Cluster_41470	4	2	1631.75	816.884	32.238	H9A1V6	Acyl-activating enzyme 4	aae4	Cannabis sativa	DEGCDDSGINIITLK	15	0	9	1.63455
Cluster_41141	2	2	1557.65	779.833	15.3196	H9A1V6	Acyl-activating enzyme 4	aae4	Cannabis sativa	NGYNSEAENLRTK	13	1	9	1.53116
Cluster_39843	2	2	1312.65	657.334	14.801	H9A1V7	Acyl-activating enzyme 5	aae5	Cannabis sativa	LNAVTISVMLR	11	0	8	1.55072
Cluster_38131	3	2	1006.5	504.257	18.3392	H9A1V8	Acyl-activating enzyme 6	aae6	Cannabis sativa	EMGALKKSK	9	2	9	1.602
Cluster_32553	2	3	1270.71	424.577	19.6784	H9A1W0	Acyl-activating enzyme 8	aae8	Cannabis sativa	KLLGTLTLNNAM	12	1	10	1.76317
Cluster_40309	3	2	1399.77	700.894	20.9731	H9A1W0	Acyl-activating enzyme 8	aae8	Cannabis sativa	MANNLTLTGLLKK	13	1	10	1.52213
Cluster_42348	4	2	1875.04	938.527	31.8025	H9A1W0	Acyl-activating enzyme 8	aae8	Cannabis sativa	VFITDSLPKTATGKIQR	17	2	11	1.64769
Cluster_42536	2	2	1931.83	966.923	28.0932	A0A0C5AUH9	ATP synthase CF1 epsilon subunit	atpE	Cannabis sativa	LQDQWLTMALMGGFAR	16	0	11	1.51267
Cluster_41697	3	2	1689.83	845.921	37.8233	A0A0C5ARX6	ATP synthase subunit alpha	atpA	Cannabis sativa	ILNTGTVLQVGDGIAR	16	0	6	1.71295
Cluster_38849	2	2	1131.5	566.755	14.726	A0A0C5ARX6	ATP synthase subunit alpha	atpA	Cannabis sativa	QAIQEQMER	9	0	9	2.06197
Cluster_38853	3	2	1131.56	566.785	15.525	A0A0C5ARX6	ATP synthase subunit alpha	atpA	Cannabis sativa	QAIQEQMER	9	0	9	2.33239
Cluster_38929	2	2	1147.53	574.77	11.3723	A0A0C5ARX6	ATP synthase subunit alpha	atpA	Cannabis sativa	QAIQEQMER	9	0	9	2.12006
Cluster_41370	4	2	1605.79	803.902	40.5169	A0A0C5ARX6	ATP synthase subunit alpha	atpA	Cannabis sativa	TSSIIEQFQPKNTK	14	1	10	1.6416
Cluster_39508	5	2	1251.72	626.869	22.2739	A0A0C5ARX6	ATP synthase subunit alpha	atpA	Cannabis sativa	LIESPAPGIISR	12	0	15	3.17639
Cluster_40308	2	2	1399.79	700.902	27.4641	A0A0C5ARX6	ATP synthase subunit alpha	atpA	Cannabis sativa	IAQIPVSEAFLGR	13	0	18	3.68614
Cluster_41419	3	2	1618.81	810.414	20.366	A0A0C5ARX6	ATP synthase subunit alpha	atpA	Cannabis sativa	TNKPQFQEIISSTK	14	0	19	3.15787
Cluster_41450	5	2	1625.92	813.966	26.0507	A0A0C5ARX6	ATP synthase subunit alpha	atpA	Cannabis sativa	ILNTGTVLQVGDGIAR	16	0	20	4.58443
Cluster_42432	4	2	1901.89	951.953	17.9435	A0A0M5M1Z3	ATP synthase subunit alpha	atp1	Cannabis sativa	LFADLEMKRENTLGGK	16	2	6	1.62668
Cluster_37987	2	2	980.507	491.261	23.8217	A0A0M5M1Z3	ATP synthase subunit alpha	atp1	Cannabis sativa	MELDAFLK	8	0	8	1.80755
Cluster_39762	4	2	1298.7	650.355	20.2348	A0A0M5M1Z3	ATP synthase subunit alpha	atp1	Cannabis sativa	QNLITDIAIATK	12	0	8	1.78035
Cluster_40972	3	2	1520.82	761.417	18.7793	A0A0M5M1Z3	ATP synthase subunit alpha	atp1	Cannabis sativa	LLLSMQRYAVAQK	13	1	8	1.57323
Cluster_37939	2	2	970.524	486.269	17.2851	A0A0M5M1Z3	ATP synthase subunit alpha	atp1	Cannabis sativa	VVSVGDGIAR	10	0	11	1.69085
Cluster_38224	3	2	1023.61	512.811	30.0623	A0A0M5M1Z3	ATP synthase subunit alpha	atp1	Cannabis sativa	AVDSLVPIGR	10	0	11	1.62644
Cluster_42542	4	2	1934.96	968.486	13.555	A0A0M5M1Z3	ATP synthase subunit alpha	atp1	Cannabis sativa	TAIAIDTILNQKQMNSR	17	1	11	1.78028
Cluster_42541	2	2	1934.95	968.485	40.6248	A0A0M5M1Z3	ATP synthase subunit alpha	atp1	Cannabis sativa	TAIAIDTILNQKQMNSR	17	1	12	1.51093
Cluster_39278	2	2	1209.68	605.848	29.8928	A0A0M5M1Z3	ATP synthase subunit alpha	atp1	Cannabis sativa	VVDALGVPIDGR	12	0	13	2.36637
Cluster_42411	2	2	1893.99	948.005	32.7757	A0A0M5M1Z3	ATP synthase subunit alpha	atp1	Cannabis sativa	KMELDAFLKENALPYL	16	2	14	2.23306
Cluster_39277	3	2	1209.67	605.844	23.8025	A0A0M5M1Z3	ATP synthase subunit alpha	atp1	Cannabis sativa	VVDALGVPIDGR	12	0	17	3.08369
Cluster_41758	2	2	1704.84	853.425	27.6218	A0A0M5M1Z3	ATP synthase subunit alpha	atp1	Cannabis sativa	DNGMHALIIYDDLSK	15	0	19	2.5641
Cluster_41576	4	2	1658.81	830.414	22.6774	E5DK51	ATP synthase subunit alpha	atp1	Cannabis sativa	AMKQVCGSLKLELAQ	15	2	10	1.86977
Cluster_42636	5	2	1968.04	985.026	30.7772	F8TR83	ATP synthase subunit beta	atpB	Cannabis sativa	IFNVLGEPIDNLGPVDTR	18	0	26	5.03978
Cluster_38028	2	2	988.52	495.268	18.8652	A0A0C5AUE9	ATP synthase subunit beta, chloroplastic	atpF	Cannabis sativa	LNLINSTSK	9	0	7	1.51333
Cluster_42575	2	2	1945.89	973.953	33.1551	A0A0C5AUE9	ATP synthase subunit beta, chloroplastic	atpF	Cannabis sativa	TISTNIDMFGMMKEITD	17	1	10	2.42715
Cluster_40805	3	2	1492.76	747.386	20.0308	A0A0U2DTF2	ATP synthase subunit beta, chloroplastic	atpB	Cannabis sativa subsp. sativa	MLGDTASMAVARVR	14	1	6	1.55854
Cluster_38362	2	2	1048.49	525.254	14.3823	A0A0U2DTF2	ATP synthase subunit beta, chloroplastic	atpB	Cannabis sativa subsp. sativa	ATNLEMENK	9	0	9	1.68973
Cluster_38342	2	2	1044.59	523.305	31.9675	A0A0U2DTF2	ATP synthase subunit beta, chloroplastic	atpB	Cannabis sativa subsp. sativa	VVDLLAPYR	9	0	11	2.13017
Cluster_38345	2	2	1044.6	523.307	26.3256	A0A0U2DTF2	ATP synthase subunit beta, chloroplastic	atpB	Cannabis sativa subsp. sativa	VVDLLAPYR	9	0	11	2.62182
Cluster_41261	2	2	1581.65	791.833	22.8722	A0A0U2DTF2	ATP synthase subunit beta, chloroplastic	atpB	Cannabis sativa subsp. sativa	ESGVINEQNIAESK	14	0	11	1.829
Cluster_37960	2	2	974.558	488.286	23.8707	A0A0U2DTF2	ATP synthase subunit beta, chloroplastic	atpB	Cannabis sativa subsp. sativa	IGLFGGAGVGK	11	0	12	2.3536
Cluster_37962	2	2	974.557	488.286	40.4326	A0A0U2DTF2	ATP synthase subunit beta, chloroplastic	atpB	Cannabis sativa subsp. sativa	IGLFGGAGVGK	11	0	13	2.13529
Cluster_39433	4	2	1237.58	619.8	18.207	A0A0U2DTF2	ATP synthase subunit beta, chloroplastic	atpB	Cannabis sativa subsp. sativa	AVAMSATDGLMR	12	0	14	2.03243
Cluster_42047	3	2	1784.79	893.401	32.645	A0A0U2DTF2	ATP synthase subunit beta, chloroplastic	atpB	Cannabis sativa subsp. sativa	INPTTSSPGVPALENK	16	0.000694444	14	2.50075
Cluster_40479	2	2	1430.69	716.351	14.4416	A0A0U2DTF2	ATP synthase subunit beta, chloroplastic	atpB	Cannabis sativa subsp. sativa	IVGEEHYETAQR	12	0	16	3.01984
Cluster_39339	4	2	1221.59	611.804	21.3187	A0A0U2DTF2	ATP synthase subunit beta, chloroplastic	atpB	Cannabis sativa subsp. sativa	AVAMSATDGLMR	12	0	17	3.07159
Cluster_40475	3	2	1430.64	716.326	14.5784	A0A0U2DTF2	ATP synthase subunit beta, chloroplastic	atpB	Cannabis sativa subsp. sativa	IVGEEHYETAQR	12	0	17	2.81097
Cluster_40948	2	2	1516.77	759.394	26.7608	A0A0U2DTF2	ATP synthase subunit beta, chloroplastic	atpB	Cannabis sativa subsp. sativa	ESGVINEQNIAESK	14	0	17	3.50417
Cluster_41355	2	2	1600.82	801.416	22.1765	A0A0U2DTF2	ATP synthase subunit beta, chloroplastic	atpB	Cannabis sativa subsp. sativa	VALVYGQMNEPPGAR	15	0	18	3.98074
Cluster_40698	5	2	1470.86	736.436	37.499	A0A0U2DTF2	ATP synthase subunit beta, chloroplastic	atpB	Cannabis sativa subsp. sativa	TVLIMELINNIAK	13	0	19	4.38703
Cluster_40496	4	2	1433.74	717.878	27.1376	A0A0U2DTF2	ATP synthase subunit beta, chloroplastic	atpB	Cannabis sativa subsp. sativa	FVQAGSEVSALLGR	14	0	19	4.10635
Cluster_41441	3	2	1623.85	812.934	20.6299	A0A0U2DTF2	ATP synthase subunit beta, chloroplastic	atpB	Cannabis sativa subsp. sativa	INPTTSSPGVPALENK	16	0	19	4.06594
Cluster_42587	3	2	1949.01	975.512	42.6172	A0A0U2DTF2	ATP synthase subunit beta, chloroplastic	atpB	Cannabis sativa subsp. sativa	DVNEQDVLLFIDNIFR	16	0	21	4.29009
Cluster_34115	2	3	1968.05	657.025	30.8907	A0A0U2DTF2	ATP synthase subunit beta, chloroplastic	atpB	Cannabis sativa subsp. sativa	IFNVLGEPIDNLGPVDTR	18	0.000694444	33	4.15919
Cluster_42363	2	2	1878.77	940.394	20.744	A0A0U2H0U7	ATP synthase subunit beta, chloroplastic	atpB	Humulus lupulus	INPTTSSPGVPALEKK	16	1	15	1.65159
Cluster_42691	7	2	1988.98	995.498	25.9323	A0A0U2H0U7	ATP synthase subunit beta, chloroplastic	atpB	Humulus lupulus	MRINPTTSSPGVPALEKK	18	2	17	1.72827
Cluster_42299	3	2	1854.93	928.474	28.0114	A0A0U2H587	ATP synthase subunit beta, chloroplastic	atpB	Humulus lupulus	WNLINSTSKTLEQLK	15	1	9	1.58355
Cluster_40407	4	2	1415.75	708.88	15.2757	A0A0U2DTF2	ATP synthase subunit beta, chloroplastic	atpB	Cannabis sativa	ATNLEMENKLKK	12	0.000717593	14	2.74644
Cluster_40924	3	2	1512.8	757.405	17.2662	A0A0M4S8F3	ATPase subunit 4	atp4	Cannabis sativa	VNLNRCLLAQVTK	13	1	8	1.65251
Cluster_42602	4	2	1957.05	979.531	36.6706	A0A0M4S8F3	ATPase subunit 4	atp4	Cannabis sativa	KMLFAAILSICALSSKK	17	2	8	1.65278
Cluster_42214	6	2	1829.99	916.001	32.6517	A0A0M4S8F3	ATPase subunit 4	atp4	Cannabis sativa	MLFAAILSICALSSKK	16	1	10	1.65344
Cluster_42046	2	2	1783.81	892.912	28.6905	A0A0M4S8F3	ATPase subunit 4	atp4	Cannabis sativa	MLFAAILSICALSSK	15	0.000694444	11	1.726
Cluster_42634	4	2	1967.91	984.962	17.555	A0A0M4S8F3	ATPase subunit 4	atp4	Cannabis sativa	ICGTVVESLPMARCAPK	17	1	11	1.58281
Cluster_40417	2	2	1418.76	710.388	16.7404	A0A0M4S8F3	ATPase subunit 4	atp4	Cannabis sativa	MRLTSTNMQARK	12	2	11	1.72702
Cluster_39383	2	2	1228.57	615.292	16.1956	A0A0M4S8F3	ATPase subunit 4	atp4	Cannabis sativa	LTSTNMQARK	10	1	14	1.63809
Cluster_41388	4	2	1610.92	806.465	19.2929	I6XT51	Betv1-like protein	Betv1	Cannabis sativa	KITFGQGVPFKYVK	14	2	8	1.67317
Cluster_38615	2	2	1093.56	547.786	13.3863	I6XT51	Betv1-like protein	Betv1	Cannabis sativa	FPVGQGFTIK	10	0	9	1.53448
Cluster_42242	5	2	1839.82	920.915	20.1664	I6XT51	Betv1-like protein	Betv1	Cannabis sativa	NYAEPHDKLYAEVTK	15	1	9	2.02578
Cluster_38608	2	2	1092.61	547.31	24.8364	I6XT51	Betv1-like protein	Betv1	Cannabis sativa	ITFGQGVPFK	10	0	10	2.34005
Cluster_38609	4	2	1092.6	547.307	39.7353	I6XT51	Betv1-like protein	Betv1	Cannabis sativa	ITFGQGVPFK	10	0	10	2.36763
Cluster_40832	2	2	1496.82	749.417	22.8948	I6XT51	Betv1-like protein	Betv1	Cannabis sativa	KITGVGGNGELIEVK	15	1	10	1.50239
Cluster_38606	4	2	1092.6	547.307	30.6387	I6XT51	Betv1-like protein	Betv1	Cannabis sativa	ITFGQGVPFK	10	0	11	2.48563
Cluster_38610	2	2	1092.61	547.31	26.2319	I6XT51	Betv1-like protein	Betv1	Cannabis sativa	ITFGQGVPFK	10	0	11	2.6053
Cluster_37204	3	2	822.453	412.234	17.9982	I6XT51	Betv1-like protein	Betv1	Cannabis sativa	TVEAYLK	7	0	12	1.51855
Cluster_37205	2	2	822.451	412.233	33.2183	I6XT51	Betv1-like protein	Betv1	Cannabis sativa	TVEAYLK	7	0	12	1.51085
Cluster_41451	3	2	1626.71	814.365	26.3935	I6XT51	Betv1-like protein	Betv1	Cannabis sativa	VYKFPVGQGFTIK	13	1	13	1.64006
Cluster_41006	3	2	1527.83	764.92	17.7695	I6XT51	Betv1-like protein	Betv1	Cannabis sativa	SVTKIVNGGDGSAVLK	16	1	13	1.58489
Cluster_38834	2	2	1128.61	565.314	37.6679	I6XT51	Betv1-like protein	Betv1	Cannabis sativa	LVASGDGGNVIK	12	0	14	1.89203
Cluster_39696	2	2	1286.67	644.343	31.0891	I6XT51	Betv1-like protein	Betv1	Cannabis sativa	AFVLDGDNLVPK	12	0	14	2.71287
Cluster_40933	3	2	1513.84	757.928	20.2564	I6XT51	Betv1-like protein	Betv1	Cannabis sativa	VEILEGNGGVGTIKK	15	1	14	2.64471
Cluster_40707	3	2	1472.68	737.348	18.128	I6XT51	Betv1-like protein	Betv1	Cannabis sativa	YYSAGDAQVNEEK	13	0	15	2.09889
Cluster_40929	3	2	1513.81	757.913	27.8425	I6XT51	Betv1-like protein	Betv1	Cannabis sativa	VEILEGNGGVGTIKK	15	1	15	3.05767
Cluster_39699	2	2	1286.7	644.359	28.0014	I6XT51	Betv1-like protein	Betv1	Cannabis sativa	AFVLDGDNLVPK	12	0	16	3.24047
Cluster_40755	3	2	1482.84	742.425	24.9614	I6XT51	Betv1-like protein	Betv1	Cannabis sativa	ITFGQGVPFKYVK	13	1	16	3.33633
Cluster_40925	4	2	1512.86	757.436	40.2365	I6XT51	Betv1-like protein	Betv1	Cannabis sativa	VEILEGNGGVGTIKK	15	1	16	2.85803
Cluster_40926	5	2	1512.87	757.44	20.7447	I6XT51	Betv1-like protein	Betv1	Cannabis sativa	VEILEGNGGVGTIKK	15	1	16	2.90022
Cluster_38827	5	2	1128.59	565.301	17.45	I6XT51	Betv1-like protein	Betv1	Cannabis sativa	LVASGDGGNVIK	12	0	17	2.18815
Cluster_38830	4	2	1128.62	565.316	16.9095	I6XT51	Betv1-like protein	Betv1	Cannabis sativa	LVASGDGGNVIK	12	0	17	2.9545
Cluster_38833	5	2	1128.62	565.317	28.4075	I6XT51	Betv1-like protein	Betv1	Cannabis sativa	LVASGDGGNVIK	12	0	17	2.78415
Cluster_39697	4	2	1286.68	644.349	32.1035	I6XT51	Betv1-like protein	Betv1	Cannabis sativa	AFVLDGDNLVPK	12	0	17	3.37021
Cluster_39698	3	2	1286.7	644.355	26.5863	I6XT51	Betv1-like protein	Betv1	Cannabis sativa	AFVLDGDNLVPK	12	0	17	3.46689
Cluster_33024	3	3	1482.83	495.284	24.942	I6XT51	Betv1-like protein	Betv1	Cannabis sativa	ITFGQGVPFKYVK	13	1	17	1.86426
Cluster_40923	2	2	1512.84	757.425	28.6985	I6XT51	Betv1-like protein	Betv1	Cannabis sativa	VEILEGNGGVGTIKK	15	1	17	3.40682
Cluster_41543	5	2	1648.78	825.399	20.0239	I6XT51	Betv1-like protein	Betv1	Cannabis sativa	TVEAYLKDHPEAYN	14	1	18	3.59095
Cluster_41642	2	2	1674.94	838.477	28.3307	I6XT51	Betv1-like protein	Betv1	Cannabis sativa	LFKAFVLDGDNLVPK	15	1	18	3.20139
Cluster_40227	2	2	1385.75	693.885	36.3665	I6XT51	Betv1-like protein	Betv1	Cannabis sativa	VEILEGNGGVGTIK	14	0	19	3.54302
Cluster_41389	3	2	1610.93	806.472	23.0705	I6XT51	Betv1-like protein	Betv1	Cannabis sativa	KITFGQGVPFKYVK	14	2	19	3.8452
Cluster_40223	2	2	1385.74	693.875	26.2116	I6XT51	Betv1-like protein	Betv1	Cannabis sativa	VEILEGNGGVGTIK	14	0	20	3.57536
Cluster_40225	2	2	1385.74	693.879	34.8069	I6XT51	Betv1-like protein	Betv1	Cannabis sativa	VEILEGNGGVGTIK	14	0	20	3.56863
Cluster_40222	2	2	1385.75	693.882	24.194	I6XT51	Betv1-like protein	Betv1	Cannabis sativa	VEILEGNGGVGTIK	14	0	21	3.56296
Cluster_41074	4	2	1542.9	772.458	17.8601	I6XT51	Betv1-like protein	Betv1	Cannabis sativa	LVASGDGGNVIKTVSK	16	1	21	4.01411
Cluster_42192	3	2	1823.98	913	16.0689	I6XT51	Betv1-like protein	Betv1	Cannabis sativa	ITHESKLVASGDGGNVIK	18	1	23	5.07241
Cluster_40705	6	2	1472.65	737.332	15.6215	I6XT51	Betv1-like protein	Betv1	Cannabis sativa	YYSAGDAQVNEEK	13	0.000694444	19	4.18556
Cluster_37635	2	2	911.492	456.754	21.21	A6P6V9	Cannabidiolic acid synthase	CBDAS	Cannabis sativa	LAYLNYR	7	0	8	1.53111
Cluster_38945	2	2	1149.62	575.816	20.1759	A6P6V9	Cannabidiolic acid synthase	CBDAS	Cannabis sativa	NEQSIPPLPR	10	0	10	2.11903
Cluster_39340	3	2	1221.62	611.819	27.5584	A6P6V9	Cannabidiolic acid synthase	CBDAS	Cannabis sativa	TLVDPNNFFR	10	0	12	1.96234
Cluster_42287	4	2	1850.02	926.017	28.4648	A6P6V9	Cannabidiolic acid synthase	CBDAS	Cannabis sativa	LVKVKTLVDPNNFFR	15	2	12	1.94577
Cluster_32885	2	3	1419.76	474.261	12.8679	A6P6V9	Cannabidiolic acid synthase	CBDAS	Cannabis sativa	FFNNPDVLTKVK	12	1	13	2.00512
Cluster_38642	2	2	1098.56	550.289	28.3479	A6P6V9	Cannabidiolic acid synthase	CBDAS	Cannabis sativa	DLDIGINDPK	10	0	14	2.59105
Cluster_40730	3	2	1476.77	739.394	32.6177	A6P6V9	Cannabidiolic acid synthase	CBDAS	Cannabis sativa	NIYNFMTPYVSK	12	0	16	2.05774
Cluster_41650	4	2	1676.8	839.407	17.2561	A6P6V9	Cannabidiolic acid synthase	CBDAS	Cannabis sativa	LVAVPKSTMFSVKK	14	2	16	1.554
Cluster_41296	4	2	1588.77	795.393	20.6693	A6P6W1	Cannabidiolic acid synthase-like 2	CBDAS-like 2	Cannabis sativa	CLSQYIPTNVTNAK	14	0.000694444	10	1.55391
Cluster_41211	2	2	1571.68	786.847	12.8763	A0A1V0QSI2	4-(cytidine 5'-diphospho)-2-C-methyl-D-erythritol kinase	CMK	Cannabis sativa	RQVEIVYDADER	12	1	10	1.74333
Cluster_41927	6	2	1753.78	877.896	18.2765	A0A1V0QSI2	4-(cytidine 5'-diphospho)-2-C-methyl-D-erythritol kinase	CMK	Cannabis sativa	KDSLSTNASGVPLDDR	16	1	11	1.80559
Cluster_42213	4	2	1829.93	915.972	29.5196	A0A1V0QSI2	4-(cytidine 5'-diphospho)-2-C-methyl-D-erythritol kinase	CMK	Cannabis sativa	INKLADVVDKEAPLSR	16	2	12	1.5858
Cluster_42599	2	2	1955.97	978.991	28.7073	A0A1V0QSI2	4-(cytidine 5'-diphospho)-2-C-methyl-D-erythritol kinase	CMK	Cannabis sativa	SRISRPSSLKIVVSER	16	2	16	1.61667
Cluster_37788	4	2	938.608	470.311	20.9931	A0A0U2DTH9	Cytochrome b559 subunit alpha	psbE	Cannabis sativa subsp. sativa	QGVPLITGR	9	0	7	1.58828
Cluster_40761	5	2	1484.69	743.352	27.4237	A0A0U2DTH9	Cytochrome b559 subunit alpha	psbE	Cannabis sativa subsp. sativa	FDSLEQLDEFSR	12	0	18	2.8553
Cluster_39745	2	2	1294.68	648.35	28.6102	P00053	Cytochrome c	cytC	Cannabis sativa	ADLIAYLKESTA	12	1	14	2.65213
Cluster_40875	3	2	1504.69	753.351	15.0022	P00053	Cytochrome c	cytC	Cannabis sativa	QSGTTAGYSYSAANK	15	0	20	3.20492
Cluster_40706	3	2	1472.7	737.355	22.656	A0A0M4RVN1	Cytochrome c biogenesis FC	ccmFc	Cannabis sativa	TLLSLARDRSAK	12	2	16	1.78955
Cluster_42286	4	2	1849.96	925.987	20.8234	A0A0M3UM18	Cytochrome c biogenesis FN	ccmFn	Cannabis sativa	EMVVAQSTLVHLGHSAR	17	0	10	1.59081
Cluster_41107	4	2	1548.84	775.425	24.7673	A0A0M3UM18	Cytochrome c biogenesis FN	ccmFn	Cannabis sativa	MNGIVALHSPPMRK	14	1	10	1.53348
Cluster_41360	4	2	1602.78	802.398	21.1161	A0A0C5B2L0	Cytochrome c biogenesis protein CcsA	ccsA	Cannabis sativa	KNILQKTSFLSSR	13	2	13	1.58159
Cluster_41958	6	2	1760.79	881.402	27.7494	A0A0U2DW83	Cytochrome f	petA	Cannabis sativa subsp. sativa	IPYDLQLKQVLANGK	15	0.0430556	5	1.70693
Cluster_42380	5	2	1883.85	942.931	33.1742	A0A0C5ARQ8	DNA-directed RNA polymerase subunit beta	rpoB	Cannabis sativa	ALMSSNMQRQAVPLSR	16	0.0430556	13	1.98601
Cluster_33592	2	3	1761.91	588.311	20.6556	A0A0C5ARQ8	DNA-directed RNA polymerase subunit beta	rpoB	Cannabis sativa	YYIGPSQLIQNIVIR	15	0	21	1.53752
Cluster_41732	5	2	1696.76	849.388	19.8004	A0A0C5ARX9	DNA-directed RNA polymerase subunit beta	rpoB	Cannabis sativa	GEASLFYVNTQDQDK	15	0	8	1.5236
Cluster_38721	3	2	1110.59	556.303	17.0091	A0A0C5ARX9	DNA-directed RNA polymerase subunit beta	rpoB	Cannabis sativa	KEVRVLGGVR	10	2	8	1.65779
Cluster_41598	2	2	1664.83	833.424	23.6488	A0A0C5ARX9	DNA-directed RNA polymerase subunit beta	rpoB	Cannabis sativa	AGLVFHNKVIDGTAIK	16	1	9	1.91683
Cluster_41790	2	2	1713.81	857.912	36.3415	A0A0C5ARX9	DNA-directed RNA polymerase subunit beta	rpoB	Cannabis sativa	FGTGVPIMGGLVVNEK	16	0	12	1.59125
Cluster_42650	4	2	1971.96	986.988	24.3727	A0A0C5AUF5	DNA-directed RNA polymerase subunit beta	rpoC	Cannabis sativa	STTLLDILTNNRYIVR	16	1	12	1.78833
Cluster_42430	4	2	1901.88	951.95	27.5255	A0A0C5AUF5	DNA-directed RNA polymerase subunit beta	rpoC1	Cannabis sativa	EPFFGNSYAAIGAYRQK	17	1	6	1.54343
Cluster_42435	2	2	1901.88	951.949	34.7388	A0A0C5AUF5	DNA-directed RNA polymerase subunit beta	rpoC1	Cannabis sativa	EPFFGNSYAAIGAYRQK	17	1	8	1.91127
Cluster_42439	2	2	1901.89	951.953	32.6242	A0A0C5AUF5	DNA-directed RNA polymerase subunit beta	rpoC1	Cannabis sativa	EPFFGNSYAAIGAYRQK	17	1	10	1.62088
Cluster_41656	4	2	1677.8	839.906	13.4876	A0A0C5AUF5	DNA-directed RNA polymerase subunit beta	rpoC1	Cannabis sativa	FRGEKGEIVDSFSK	14	2	10	1.97422
Cluster_39796	4	2	1304.59	653.304	11.9529	A0A0C5AUF5	DNA-directed RNA polymerase subunit beta	rpoC1	Cannabis sativa	IYKYTNDGIR	10	1	11	1.58663
Cluster_40239	2	2	1387.72	694.866	16.88	A0A0H3W6G1	DNA-directed RNA polymerase subunit beta	rpoC2	Cannabis sativa	MAERAGLVFHNK	12	1	7	1.50698
Cluster_34036	2	3	1939.78	647.601	30.7778	A0A0U2H146	DNA-directed RNA polymerase subunit beta	rpoC2	Humulus lupulus	AGSFSMMHVPNFPDTMR	17	0	9	1.79299
Cluster_42388	2	2	1884.83	943.421	32.6951	A0A0U2H5U7	DNA-directed RNA polymerase subunit beta	rpoB	Cannabis sativa	SLPVAQRQMNSSMLAR	16	1	6	1.70711
Cluster_42086	3	2	1793.82	897.916	26.3233	A0A0X8GKF1	DNA-directed RNA polymerase subunit beta	rpoC2	Cannabis sativa	NISSRSVXTVNNDQGK	16	1	7	1.63847
Cluster_39393	2	2	1229.66	615.839	13.5206	A0A1V0IS28	DNA-directed RNA polymerase subunit beta	rpoC2	Cannabis sativa	LFPQDLLQEK	10	0	8	1.86457
Cluster_42138	4	2	1808.99	905.5	25.1723	A0A1V0QSH6	1-deoxy-D-xylulose-5-phosphate synthase	DXPS1	Cannabis sativa	LQSNRPLRELREVAK	15	2	8	1.55789
Cluster_41549	3	2	1650.82	826.416	28.8832	A0A1V0QSH6	1-deoxy-D-xylulose-5-phosphate synthase	DXPS1	Cannabis sativa	YPRGNGIGVPLPQGNK	16	1	17	1.53368
Cluster_40408	5	2	1415.7	708.858	16.4952	A0A1V0QSG8	1-deoxy-D-xylulose-5-phosphate reductoisomerase	DXR	Cannabis sativa	KITVDSATLFNK	12	0.0430556	15	1.82133
Cluster_33708	2	3	1809.81	604.277	36.2531	A0A1V0QSG8	1-deoxy-D-xylulose-5-phosphate reductoisomerase	DXR	Cannabis sativa	VHCSLQQPPPAWPGR	15	0	20	1.8079
Cluster_41742	3	2	1700.88	851.446	29.9711	A0A1V0QSH5	1-deoxy-D-xylulose-5-phosphate synthase	DXS2	Cannabis sativa	NLSTQDLEQLAAELR	15	0	11	1.52127
Cluster_38185	2	2	1016.55	509.282	18.5657	A0A1V0QSH5	1-deoxy-D-xylulose-5-phosphate synthase	DXS2	Cannabis sativa	FPRGNGIGAK	10	1	11	1.74747
Cluster_41823	5	2	1723.77	862.893	19.6674	A0A1V0QSH5	1-deoxy-D-xylulose-5-phosphate synthase	DXS2	Cannabis sativa	ILTGRRSQMHTIR	13	2	12	1.6604
Cluster_41794	4	2	1714.91	858.461	31.1164	A0A1V0QSH5	1-deoxy-D-xylulose-5-phosphate synthase	DXS2	Cannabis sativa	GKGIELITGKNNAPLK	16	2	14	1.94972
Cluster_41827	3	2	1724.78	863.397	27.669	A0A1V0QSH5	1-deoxy-D-xylulose-5-phosphate synthase	DXS2	Cannabis sativa	ILTGRRSQMHTIR	13	2	15	1.58685
Cluster_38747	2	2	1114.56	558.287	28.6889	A0A090CXP5	Edestin 1	ede1D	Cannabis sativa	EIEQERRR	8	2	8	1.76916
Cluster_41999	2	2	1770.93	886.472	17.6513	A0A1V0QSH0	Transferase FPPS1	FPPS1	Cannabis sativa	ILNENYGKADPEKVAK	16	2	10	1.53556
Cluster_42168	2	2	1817.89	909.952	22.5453	A0A1V0QSH7	Transferase FPPS2	FPPS2	Cannabis sativa	LLFEHYGKADEASVKK	16	2	5	1.54746
Cluster_40380	2	2	1411.51	706.762	16.5301	A0A1V0QSH7	Transferase FPPS2	FPPS2	Cannabis sativa	ALFSKLVAQVEK	12	1	11	1.64957
Cluster_41793	3	2	1714.85	858.43	29.581	A0A1V0QSH7	Transferase FPPS2	FPPS2	Cannabis sativa	YQVIRHHLPISYK	13	1	14	1.63132
Cluster_34171	2	3	1991.81	664.943	19.9349	A0A0C5ARQ8	geranylpyrophosphate:olivetolate geranyltransferase	GOT	Cannabis sativa	SFHLQNKCSESLSIAK	17	1	27	1.58
Cluster_41377	2	2	1607.62	804.82	23.0545	WO 2011/017798 Al	geranylpyrophosphate:olivetolate geranyltransferase	GOT	Cannabis sativa	CSESLSIAKNSIR	13	1	6	1.59
Cluster_41745	2	2	1701.69	851.854	18.0874	WO 2011/017798 Al	geranylpyrophosphate:olivetolate geranyltransferase	GOT	Cannabis sativa	TPIKYSYNNFPSK	13	1	6	1.76
Cluster_38288	2	2	1035.44	518.73	10.765	WO 2011/017798 Al	geranylpyrophosphate:olivetolate geranyltransferase	GOT	Cannabis sativa	DASDVEGDTK	10	0	11	1.76
Cluster_42680	4	2	1982.95	992.484	21.1912	WO 2011/017798 Al	geranylpyrophosphate:olivetolate geranyltransferase	GOT	Cannabis sativa	HPKTPIKYSYNNFPSK	16	2	12	1.54
Cluster_42383	4	2	1883.93	942.974	26.5258	A0A1V0QSH4	Transferase GPPS large subunit	GPPS	Cannabis sativa	KLPHYLNLNFTSLSR	15	1	8	1.51065
Cluster_42343	3	2	1872.98	937.498	39.2361	A0A1V0QSH4	Transferase GPPS large subunit	GPPS	Cannabis sativa	SRSLSTFNLNLYHPLK	16	1	13	1.73445
Cluster_40403	4	2	1415.56	708.79	14.6093	A0A1V0QSG9	Transferase GPPS small subunit	GPPS	Cannabis sativa	SNKSLSHVPMR	11	1	10	1.73723
Cluster_42333	2	2	1867.87	934.94	20.8964	A0A1V0QSI1	Transferase GPPS small subunit2	GPPS	Cannabis sativa	FGLYVGMIQGYSKIGR	16	1	11	2.1415
Cluster_37647	2	2	913.539	457.777	20.268	A0A1V0QSH9	4-hydroxy-3-methylbut-2-en-1-yl diphosphate reductase	HDR	Cannabis sativa	VVEDVLIK	8	0	8	1.98883
Cluster_38882	2	2	1139.57	570.791	18.7332	A0A1V0QSH9	4-hydroxy-3-methylbut-2-en-1-yl diphosphate reductase	HDR	Cannabis sativa	VENIPIDEGR	10	0	8	1.50931
Cluster_39012	2	2	1162.61	582.312	16.1676	A0A1V0QSH9	4-hydroxy-3-methylbut-2-en-1-yl diphosphate reductase	HDR	Cannabis sativa	AGIANQTTMLK	11	0	10	1.58387
Cluster_38914	2	2	1145.6	573.805	31.8546	A0A1V0QSH9	4-hydroxy-3-methylbut-2-en-1-yl diphosphate reductase	HDR	Cannabis sativa	AGIANQTTMLK	11	0	14	2.42727
Cluster_40586	3	2	1449.7	725.856	25.3229	A0A1V0QSH9	4-hydroxy-3-methylbut-2-en-1-yl diphosphate reductase	HDR	Cannabis sativa	GIPSYWIDSEQR	12	0	17	2.78186
Cluster_34164	2	3	1988.74	663.921	20.6886	A0A1V0QSH9	4-hydroxy-3-methylbut-2-en-1-yl diphosphate reductase	HDR	Cannabis sativa	AGIANQTTMLKGETEEIGK	19	1	25	1.90659
Cluster_40454	4	2	1425.59	713.802	15.8761	A0A1V0QSG3	4-hydroxy-3-methylbut-2-en-1-yl diphosphate synthase	HDS	Cannabis sativa	LDSLRVFDSSK	11	1	10	1.681
Cluster_41843	3	2	1727.77	864.892	16.5908	A0A1V0QSG3	4-hydroxy-3-methylbut-2-en-1-yl diphosphate synthase	HDS	Cannabis sativa	DVAGTVEEVMRIADK	15	1	12	1.81181
Cluster_40859	2	2	1501.75	751.88	21.7469	A0A1V0QSG3	4-hydroxy-3-methylbut-2-en-1-yl diphosphate synthase	HDS	Cannabis sativa	AADLQQGVAPFEEK	14	0.00138889	16	3.21744
Cluster_38605	3	2	1092.58	547.298	29.8703	A0A1V0QSG5	Isopentenyl-diphosphate delta-isomerase	IDI	Cannabis sativa	LVVDNFLFK	9	0	9	2.48063
Cluster_38984	4	2	1158.63	580.323	30.0101	A0A1V0QSG5	Isopentenyl-diphosphate delta-isomerase	IDI	Cannabis sativa	AFSVFLFNSK	10	0	13	2.29839
Cluster_41571	2	2	1657.86	829.939	26.4758	A0A1V0QSG5	Isopentenyl-diphosphate delta-isomerase	IDI	Cannabis sativa	YIIIIYSIQQWR	12	0	13	1.63096
Cluster_42466	5	2	1910.89	956.45	18.888	A0A1V0QSG5	Isopentenyl-diphosphate delta-isomerase	IDI	Cannabis sativa	YIIIIYSIQQWRR	13	1	13	1.68061
Cluster_40568	2	2	1446.72	724.368	21.6975	A0A1V0QSG5	Isopentenyl-diphosphate delta-isomerase	IDI	Cannabis sativa	ESELIDEESLGAR	13	0.00138889	18	3.56435
Cluster_41387	2	2	1610.79	806.4	22.4713	A0A1V0QSG5	Isopentenyl-diphosphate delta-isomerase	IDI	Cannabis sativa	DVSVNPNPDEVADIK	15	0	19	3.149
Cluster_34182	2	3	1996.9	666.64	24.1197	A0A1V0QSG5	Isopentenyl-diphosphate delta-isomerase	IDI	Cannabis sativa	VSLSSTMGDSADAGMDAVQR	20	0	19	1.53299
Cluster_41030	2	2	1532.78	767.399	39.0457	A0A0M5M254	Maturase R	matR	Cannabis sativa	TLQKIPISNGLNR	13	1	11	1.7917
Cluster_40036	2	2	1347.63	674.82	23.7301	A0A1V0IS32	Maturase K	matK	Cannabis sativa	NDYGVNELLNSK	12	0	9	1.7294
Cluster_41873	5	2	1733.91	867.961	25.3268	Q95BY0	Maturase K	matK	Cannabis sativa	YILRLSCVKTLAR	13	2	15	1.86929
Cluster_41877	3	2	1734.87	868.443	25.6176	Q95BY0	Maturase K	matK	Cannabis sativa	YILRLSCVKTLAR	13	2	15	1.86929
Cluster_39193	3	2	1195.58	598.799	15.5517	A0A1V0QSI0	Mevalonate kinase	MevalonateK	Cannabis sativa	MLITNTKVGR	10	1	7	1.51249
Cluster_42372	5	2	1881.97	941.994	34.1902	A0A1V0QSI0	Mevalonate kinase	MevalonateK	Cannabis sativa	SNLPLKMLITNTKVGR	16	2	10	1.67604
Cluster_41602	2	2	1665.85	833.933	25.5856	A0A1V0QSI0	Mevalonate kinase	MevalonateK	Cannabis sativa	SGNLIRMKSNLPLK	14	2	11	1.60127
Cluster_42533	2	2	1931.84	966.928	32.8886	A0A1V0QSG4	Diphosphomevalonate decarboxylase	MPDC	Cannabis sativa	QFSHSSLLSQISLSQK	16	0	7	1.58446
Cluster_42620	2	2	1962.98	982.498	38.3863	A0A1V0QSG4	Diphosphomevalonate decarboxylase	MPDC	Cannabis sativa	LERLCSQFRGGSLSIEK	17	2	7	1.6588
Cluster_42035	4	2	1781.81	891.913	22.3593	A0A1V0QSG4	Diphosphomevalonate decarboxylase	MPDC	Cannabis sativa	ETVETSLLLQHRAK	14	1	15	1.60469
Cluster_33842	2	3	1863.77	622.265	19.1093	A0A1V0QSG4	Diphosphomevalonate decarboxylase	MPDC	Cannabis sativa	NSELSKLSTMADESQK	16	1	21	2.71519
Cluster_39958	3	2	1331.75	666.88	23.3675	A0A0C5AUJ6	NAD(P)H-quinone oxidoreductase subunit 5, chloroplastic	ndhF	Cannabis sativa	SQNLVLMGGLRK	12	1	4	1.60606
Cluster_42140	2	2	1809.88	905.948	23.4943	A0A0U2GY49	NAD(P)H-quinone oxidoreductase subunit I, chloroplastic	ndhI	Humulus lupulus	YIGQSFIITLSHVNR	15	0.000694444	14	1.566
Cluster_33549	4	3	1746.93	583.318	27.3847	A0A0U2GY49	NAD(P)H-quinone oxidoreductase subunit I, chloroplastic	ndhI	Humulus lupulus	YIGQSFIITLSHVNR	15	0	16	1.99777
Cluster_39391	3	2	1229.5	615.756	14.5576	A0A0U2DTF9	NAD(P)H-quinone oxidoreductase subunit K, chloroplastic	ndhK	Cannabis sativa subsp. sativa	LYEQMPEPK	9	0	12	1.76233
Cluster_42584	4	2	1947.91	974.961	31.5405	A0A0M4S7M8	NADH dehydrogenase subunit 7	nad7	Cannabis sativa	KIRAPGSAHSQGLDSMSK	18	2	10	1.74416
Cluster_33521	3	3	1731.9	578.306	24.1962	A0A0X8GLG5	NADH dehydrogenase subunit 7	nadhd7	Cannabis sativa	IIVQCLNQMPSGMIK	15	0.00138889	14	1.9133
Cluster_42657	5	2	1974.96	988.489	28.3793	A0A0M4R4N3	NADH dehydrogenase subunit 9	nad9	Cannabis sativa	KRSPYDVGCIDISVQVR	17	2	9	1.80818
Cluster_41620	6	2	1669.76	835.887	20.5153	A0A0M4R4N3	NADH dehydrogenase subunit 9	nad9	Cannabis sativa	TSLLNYIVEFRR	12	1	15	1.67104
Cluster_33551	2	3	1747.87	583.631	20.3432	A0A0C5B2I2	NADH-quinone oxidoreductase subunit C	ndhJ	Cannabis sativa	RNPRIPSVFWVWK	13	2	20	1.77845
Cluster_33548	2	3	1746.87	583.297	22.1408	A0A0C5B2I2	NADH-quinone oxidoreductase subunit C	ndhJ	Cannabis sativa	RNPRIPSVFWVWK	13	2	22	1.63819
Cluster_42534	3	2	1931.96	966.988	26.9621	A0A0C5APZ2	NADH-quinone oxidoreductase subunit H	ndhA	Cannabis sativa	ALTIFIGITPEFVGYTK	17	0	8	1.54252
Cluster_39570	7	2	1261.61	631.812	11.4834	A0A0C5AUJ8	NADH-quinone oxidoreductase subunit K	ndhE	Cannabis sativa	KNLLNSQNIR	10	1	8	1.59927
Cluster_40950	4	2	1516.84	759.426	38.9546	A0A0C5AUJ8	NADH-quinone oxidoreductase subunit K	ndhE	Cannabis sativa	KSTRINQSNLLNK	13	2	9	1.60204
Cluster_40673	2	2	1466.74	734.379	29.0144	A0A0C5AUJ8	NADH-quinone oxidoreductase subunit K	ndhE	Cannabis sativa	STRINQSNLLNK	12	1	10	1.66676
Cluster_40674	5	2	1466.72	734.369	40.0705	A0A0C5AUJ8	NADH-quinone oxidoreductase subunit K	ndhE	Cannabis sativa	STRINQSNLLNK	12	1	11	1.56453
Cluster_41982	3	2	1766.78	884.398	36.3556	A0A0C5B2K5	NADH-quinone oxidoreductase subunit N	ndhB	Cannabis sativa	TGTDNIRDYAGLYTK	15	1	8	1.60978
Cluster_41327	2	2	1595.73	798.874	15.5785	A0A0M4S8G1	NADH-ubiquinone oxidoreductase chain 1	nad1	Cannabis sativa	YRYDQLMGLGRK	12	2	15	1.64424
Cluster_42307	3	2	1857.85	929.932	27.2376	A0A0M4RVP1	NADH-ubiquinone oxidoreductase chain 5	nad5	Cannabis sativa	GFSNTPVLFTLFLSR	15	0	10	1.61408
Cluster_37697	2	2	921.446	461.73	33.9365	P86838	Non-specific lipid-transfer protein	ltp	Cannabis sativa	CGVSIPYK	8	0	9	2.23611
Cluster_37698	2	2	921.459	461.737	29.4736	P86838	Non-specific lipid-transfer protein	ltp	Cannabis sativa	CGVSIPYK	8	0	10	2.10917
Cluster_37703	2	2	922.462	462.238	31.8106	P86838	Non-specific lipid-transfer protein	ltp	Cannabis sativa	CGVSIPYK	8	0	10	2.29651
Cluster_38451	4	2	1063.58	532.796	12.8265	W0U0V5	Non-specific lipid-transfer protein	ltp	Cannabis sativa	CLKSAASSIK	10	1	9	2.06007
Cluster_39531	3	2	1255.66	628.839	25.1214	W0U0V5	Non-specific lipid-transfer protein	ltp	Cannabis sativa	GVNFNLASGLPGK	13	0	10	1.80793
Cluster_32218	2	3	1063.58	355.533	12.8212	W0U0V5	Non-specific lipid-transfer protein	ltp	Cannabis sativa	CLKSAASSIK	10	1	14	2.35653
Cluster_39065	5	2	1172.62	587.318	12.243	W0U0V5	Non-specific lipid-transfer protein	ltp	Cannabis sativa	SLSGAAKTPADR	12	1	14	3.14479
Cluster_39629	2	2	1272.69	637.35	38.452	W0U0V5	Non-specific lipid-transfer protein	ltp	Cannabis sativa	GVNFNLASGLPGK	13	0	17	3.42085
Cluster_39627	4	2	1272.69	637.35	25.2824	W0U0V5	Non-specific lipid-transfer protein	ltp	Cannabis sativa	GVNFNLASGLPGK	13	0	18	4.04957
Cluster_41863	2	2	1730.89	866.451	12.083	W0U0V5	Non-specific lipid-transfer protein	ltp	Cannabis sativa	SLSGAAKTPADRQAACK	17	2	19	4.88196
Cluster_42489	4	2	1917.04	959.529	24.8582	W0U0V5	Non-specific lipid-transfer protein	ltp	Cannabis sativa	SAASSIKGVNFNLASGLPGK	20	1	25	4.99188
Cluster_33978	2	3	1917.05	640.022	24.878	W0U0V5	Non-specific lipid-transfer protein	ltp	Cannabis sativa	SAASSIKGVNFNLASGLPGK	20	1	30	4.97201
Cluster_40692	6	2	1469.79	735.904	31.4732	I1V0C9	Olivetolic acid cyclase	OAC	Cannabis sativa	TYVNLVNIIPAMK	13	0.00138889	18	3.17197
Cluster_32539	3	3	1264.73	422.583	25.3542	I6WU39	Olivetolic acid cyclase	OAC	Cannabis sativa	LLIFDYTPRK	10	1	10	1.7392
Cluster_38870	2	2	1136.62	569.319	28.7973	I6WU39	Olivetolic acid cyclase	OAC	Cannabis sativa	LLIFDYTPR	9	0	11	2.11882
Cluster_39974	4	2	1334.69	668.354	18.6099	I6WU39	Olivetolic acid cyclase	OAC	Cannabis sativa	DVYWGKDVTQK	11	1	12	1.90332
Cluster_40717	2	2	1473.86	737.938	32.0584	I6WU39	Olivetolic acid cyclase	OAC	Cannabis sativa	TYVNLVNIIPAMK	13	0	17	3.12386
Cluster_40713	2	2	1473.76	737.89	30.962	I6WU39	Olivetolic acid cyclase	OAC	Cannabis sativa	TYVNLVNIIPAMK	13	0	18	3.0322
Cluster_37801	2	2	942.556	472.285	23.8051	V5KWZ6	Phenylalanine ammonia-lyase	PAL	Cannabis sativa	QLAGGNKTR	9	1	7	1.52982
Cluster_37810	3	2	943.527	472.771	38.6232	V5KWZ6	Phenylalanine ammonia-lyase	PAL	Cannabis sativa	QLAGGNKTR	9	1	7	1.79086
Cluster_37809	3	2	943.531	472.773	22.6646	V5KWZ6	Phenylalanine ammonia-lyase	PAL	Cannabis sativa	QLAGGNKTR	9	1	9	1.66656
Cluster_42525	4	2	1929.92	965.968	19.6822	V5KWZ6	Phenylalanine ammonia-lyase	PAL	Cannabis sativa	EINSVNDNPLIDVSRNK	17	1	10	1.55
Cluster_42204	5	2	1826.95	914.482	22.2983	A0A0U2DVM4	Photosystem I assembly protein Ycf4	ycf4	Cannabis sativa subsp. sativa	LTLNEDTRTLPISGQGK	17	1	7	1.59565
Cluster_39240	3	2	1203.61	602.812	19.4686	A0A0C5AS17	Photosystem I iron-sulfur center	psaC	Cannabis sativa	VYLWHETTR	9	0	12	2.20851
Cluster_42397	2	2	1890.84	946.426	41.0133	A0A0C5AS17	Photosystem I iron-sulfur center	psaC	Cannabis sativa	ACPTDVLEMIPWDGCK	16	0	14	3.2098
Cluster_41063	4	2	1540.74	771.375	24.2398	A0A0C5AS17	Photosystem I iron-sulfur center	psaC	Cannabis sativa	CESACPTDFLSVR	13	0.000694444	14	2.55668
Cluster_41062	3	2	1540.68	771.345	24.7024	A0A0C5AS17	Photosystem I iron-sulfur center	psaC	Cannabis sativa	CESACPTDFLSVR	13	0	17	3.43067
Cluster_41530	5	2	1644.71	823.364	19.5986	A0A0C5AS17	Photosystem I iron-sulfur center	psaC	Cannabis sativa	IYDTCIGCTQCVR	13	0.000694444	18	3.70511
Cluster_41634	3	2	1673.76	837.888	18.4512	A0A0C5AS17	Photosystem I iron-sulfur center	psaC	Cannabis sativa	QIASAPRTEDCVGCK	15	1	18	3.68923
Cluster_41700	2	2	1690.79	846.401	14.4884	A0A0C5AS17	Photosystem I iron-sulfur center	psaC	Cannabis sativa	QIASAPRTEDCVGCK	15	1	19	4.12778
Cluster_41526	2	2	1643.81	822.913	27.7692	A0A0C5AS17	Photosystem I iron-sulfur center	psaC	Cannabis sativa	IYDTCIGCTQCVR	13	0.000694444	20	3.39687
Cluster_41734	4	2	1696.78	849.395	22.4424	A0A0C5AS17	Photosystem I iron-sulfur center	psaC	Cannabis sativa	RCESACPTDFLSVR	14	1	20	3.53038
Cluster_42396	4	2	1890.84	946.427	32.4086	A0A0C5AS17	Photosystem I iron-sulfur center	psaC	Cannabis sativa	ACPTDVLEMIPWDGCK	16	0.000694444	21	4.49905
Cluster_33751	2	3	1824.85	609.291	18.0435	A0A0U2DTB0	Photosystem I P700 chlorophyll a apoprotein A1	pasA	Cannabis sativa	VAPATQPRALSIVQGR	16	1	16	1.88885
Cluster_42194	4	2	1824.85	913.434	17.1546	A0A0U2DTB0	Photosystem I P700 chlorophyll a apoprotein A1	psaA	Cannabis sativa subsp. sativa	VAPATQPRALSIVQGR	16	1	9	1.54136
Cluster_41748	2	2	1701.86	851.939	35.9712	A0A0C5APY0	Photosystem I P700 chlorophyll a apoprotein A2	psaB	Cannabis sativa	WRDKPVALSIVQAR	14	1	12	1.8871
Cluster_41644	2	2	1675.8	838.905	20.1694	A0A0C5APY0	Photosystem I P700 chlorophyll a apoprotein A2	psaB	Cannabis sativa	DYNPEQNEDNVLAR	14	0	13	2.30011
Cluster_37988	2	2	980.547	491.281	25.4694	A0A0U2DTE2	Photosystem II CP43 reaction center protein	psbC	Cannabis sativa subsp. sativa	APWLEPLR	8	0	9	1.7663
Cluster_42553	5	2	1939.93	970.973	26.9526	A0A0U2DTE2	Photosystem II CP43 reaction center protein	psbC	Cannabis sativa subsp. sativa	ITNLTLSPSIVFGYLLK	17	0.00138889	11	1.84009
Cluster_40224	4	2	1385.72	693.869	37.1056	A0A0U2DTE2	Photosystem II CP43 reaction center protein	psbC	Cannabis sativa subsp. sativa	DLEPVLFMTPLN	12	0	12	1.99497
Cluster_40451	2	2	1424.78	713.4	18.4933	A0A0U2DTE2	Photosystem II CP43 reaction center protein	psbC	Cannabis sativa subsp. sativa	LGANVGSAQGPTGLGK	16	0	19	3.64249
Cluster_40823	2	2	1495.72	748.867	21.9257	A0A0U2DTE2	Photosystem II CP43 reaction center protein	psbC	Cannabis sativa subsp. sativa	SPTGEVIFGGETMR	14	0	20	3.59398
Cluster_41951	5	2	1758.86	880.438	25.2538	A9XV91	Photosystem II CP47 reaction center protein	psbB	Cannabis sativa	VSAGLAENQSLAEAWSK	17	0.00138889	21	4.00508
Cluster_41986	2	2	1767.84	884.927	22.8676	A0A0U2DVP6	Photosystem II D2 protein	psbD	Cannabis sativa subsp. sativa	FWSQIFGVAFSNKR	14	1	9	1.66542
Cluster_39154	4	2	1188.61	595.313	18.1756	A0A0U2DVP6	Photosystem II D2 protein	psbD	Cannabis sativa subsp. sativa	MTIALGKFTK	10	1	12	1.59207
Cluster_41103	3	2	1547.73	774.871	25.2656	A0A0U2DVP6	Photosystem II D2 protein	psbD	Cannabis sativa subsp. sativa	AAEDPEFETFYTK	13	0	18	2.65605
Cluster_39875	2	2	1317.6	659.807	14.4101	A0A0U2DTE4	Photosystem II protein D1	psbA	Cannabis sativa subsp. sativa	ANLGMEVMHER	11	0	12	2.83873
Cluster_40847	2	2	1498.62	750.319	13.0778	A0A0U2DTE4	Photosystem II protein D1	psbA	Cannabis sativa subsp. sativa	ETTENESANEGYR	13	0.000694444	18	3.4077
Cluster_41096	3	2	1546.79	774.404	15.5185	A0A1V0QSH8	Phosphomevalonate kinase	PMK	Cannabis sativa	QSQEVIAKALLGAR	14	1	12	1.75803
Cluster_42247	2	2	1840.82	921.415	27.6999	A0A1V0QSH8	Phosphomevalonate kinase	PMK	Cannabis sativa	WMEQATKQSQEVIAK	15	1	12	1.55462
Cluster_42243	7	2	1839.81	920.914	19.0826	A0A1V0QSH8	Phosphomevalonate kinase	PMK	Cannabis sativa	WMEQATKQSQEVIAK	15	1	16	2.21313
Cluster_33782	2	3	1838.56	613.86	20.4697	A0A1V0QSH8	Phosphomevalonate kinase	PMK	Cannabis sativa	WMEQATKQSQEVIAK	15	1	25	2.25918
Cluster_41139	3	2	1556.78	779.398	21.2745	A0A0C5AS14	Protein TIC 214	ycf1	Cannabis sativa	NQENSKLEILNEK	13	1	9	1.517
Cluster_41890	2	2	1739.8	870.906	21.7047	A0A0C5AS14	Protein TIC 214	ycf1	Cannabis sativa	EKGNVRIEETEDIK	14	2	9	1.59161
Cluster_42326	2	2	1864.92	933.466	33.5143	A0A0H3W815	Protein TIC 214	ycf1	Cannabis sativa	IYDPFLNGAYRGQIKK	16	2	3	1.51764
Cluster_42699	4	2	1990.95	996.481	30.3513	A0A0H3W815	Protein TIC 214	ycf1	Cannabis sativa	YLLFQLRWDNSLNTK	15	1	5	1.52026
Cluster_42574	3	2	1945.77	973.894	25.6612	A0A0H3W815	Protein TIC 214	ycf1	Cannabis sativa	IYDPFLNGAYRGQIKK	16	2	7	1.50501
Cluster_40927	4	2	1512.88	757.445	32.3325	A0A0H3W815	Protein TIC 214	ycf1	Cannabis sativa	GILLIEPVRLSIK	13	1	8	1.59434
Cluster_42134	2	2	1807.81	904.913	28.273	A0A0H3W815	Protein TIC 214	ycf1	Cannabis sativa	WDNSLNTKMIANIK	14	1	8	1.50749
Cluster_42180	4	2	1820.89	911.454	14.2134	A0A0H3W815	Protein TIC 214	ycf1	Cannabis sativa	SSFNFKTNYLLTEQK	15	1	8	1.53903
Cluster_42160	3	2	1815.85	908.932	23.3989	A0A0H3W815	Protein TIC 214	ycf1	Cannabis sativa	KELGDLILSKSNLTK	15	2	9	1.66759
Cluster_40050	5	2	1350.59	676.302	17.9031	A0A0H3W815	Protein TIC 214	ycf1	Cannabis sativa	WQNIGYNSPNR	11	0	10	1.62718
Cluster_39867	4	2	1315.73	658.873	20.4377	A0A0H3W815	Protein TIC 214	ycf1	Cannabis sativa	KQKESNILLNK	11	2	10	1.58493
Cluster_40620	2	2	1455.64	728.829	28.4861	A0A0H3W815	Protein TIC 214	ycf1	Cannabis sativa	GEMSLDILMIQK	12	0	11	1.65019
Cluster_41861	2	2	1730.87	866.441	21.1479	A0A0H3W815	Protein TIC 214	ycf1	Cannabis sativa	KFFLISQNQIVGEK	14	1	12	1.50332
Cluster_42667	4	2	1979.98	990.998	29.2963	A0A0H3W815	Protein TIC 214	ycf1	Cannabis sativa	YNNIPIDILMNYIKQK	16	1	12	1.71167
Cluster_40020	4	2	1344.77	673.391	13.416	A0A0H3W815	Protein TIC 214	ycf1	Cannabis sativa	LIPPKSRNIVK	11	2	12	1.52399
Cluster_40155	3	2	1373.64	687.829	18.8117	A0A0H3W815	Protein TIC 214	ycf1	Cannabis sativa	VKALDKTLNSK	11	2	12	1.77224
Cluster_40967	5	2	1520.75	761.382	16.2389	A0A0H3W815	Protein TIC 214	ycf1	Cannabis sativa	YRQNITHTSKHR	12	2	12	1.54687
Cluster_41147	2	2	1558.84	780.43	19.8227	A0A0H3W815	Protein TIC 214	ycf1	Cannabis sativa	KYIILPSLIIVK	12	1	13	1.537
Cluster_40662	3	2	1464.67	733.343	15.4753	A0A0H3W815	Protein TIC 214	ycf1	Cannabis sativa	NIVKKNSIVQNK	12	2	13	1.67101
Cluster_40736	2	2	1477.72	739.865	20.3386	A0A0H3W815	Protein TIC 214	ycf1	Cannabis sativa	TNYLLTEQKQVR	12	1	14	1.6899
Cluster_33459	3	3	1702.7	568.573	18.0874	A0A0H3W815	Protein TIC 214	ycf1	Cannabis sativa	HKSTHTINQRYR	12	2	14	1.74899
Cluster_42668	2	2	1979.98	990.999	36.4695	A0A0H3W815	Protein TIC 214	ycf1	Cannabis sativa	YNNIPIDILMNYIKQK	16	1	15	1.97073
Cluster_42669	2	2	1980	991.005	38.1652	A0A0H3W815	Protein TIC 214	ycf1	Cannabis sativa	YNNIPIDILMNYIKQK	16	1	15	1.73283
Cluster_39809	2	2	1307.63	654.823	14.1198	A0A0N9ZJA6	Protein translocase subunit	secA	Cannabis sativa' phytoplasma	EESYIIDLESK	11	0	9	1.72531
Cluster_42310	3	2	1858.85	930.434	24.7393	A0A0N9ZJA6	Protein translocase subunit	secA	Cannabis sativa' phytoplasma	NLYSGNNYALLHCIK	15	0	9	1.62994
Cluster_37727	2	2	927.376	464.695	12.4802	A0A0N9ZJA6	Protein translocase subunit	secA	Cannabis sativa' phytoplasma	ISGMTGTAK	9	0	10	1.54373
Cluster_41200	5	2	1569.68	785.848	24.1626	A0A0N9ZJA6	Protein translocase subunit	secA	Cannabis sativa	IYKKISGMTGTAK	13	2	11	1.659
Cluster_41363	6	2	1603.84	802.928	27.1668	A0A0N9ZJA6	Protein translocase subunit	secA	Cannabis sativa' phytoplasma	TPLIISSQKKQGIK	14	2	14	1.59842
Cluster_42033	6	2	1780.88	891.447	21.2607	A0A0N9ZJA6	Protein translocase subunit	secA	Cannabis sativa' phytoplasma	TPLIISSQKKQGIK	14	2	14	1.51788
Cluster_33357	2	3	1649.83	550.951	25.0836	A0A0N9ZJA6	Protein translocase subunit	secA	Cannabis sativa' phytoplasma	TLKEESYIIDLESK	14	1	21	1.95712
Cluster_42368	3	2	1880.94	941.479	26.9671	A0A0C5APZ4	Protein Ycf2	ycf2	Cannabis sativa	QSKKLNSFHQNIMYK	15	2	6	1.57739
Cluster_41199	6	2	1569.68	785.847	23.0835	A0A0C5APZ4	Protein Ycf2	Ycf2	Cannabis sativa	KDLSKSLPFFLSK	13	2	7	1.548
Cluster_42422	3	2	1899.96	950.988	24.8475	A0A0C5APZ4	Protein Ycf2	ycf2	Cannabis sativa	IDQILLSLTHSDHLSK	16	0	8	1.52958
Cluster_40497	3	2	1433.74	717.876	28.5805	A0A0C5APZ4	Protein Ycf2	ycf2	Cannabis sativa	FYITLQFELAK	11	0	11	1.66147
Cluster_41255	2	2	1579.53	790.771	22.512	A0A0C5APZ4	Protein Ycf2	ycf2	Cannabis sativa	SSFVQVTDYSQLK	13	0	12	1.51476
Cluster_42327	2	2	1865.01	933.511	18.8356	A0A0C5APZ4	Protein Ycf2	ycf2	Cannabis sativa	SKFLINGGTISPFLFNK	17	1	12	1.55856
Cluster_33659	2	3	1793.75	598.925	36.3841	A0A0C5APZ4	Protein Ycf2	ycf2	Cannabis sativa	SEDRSNFVENLFQK	14	1	14	1.52597
Cluster_33873	2	3	1880.62	627.881	32.1307	A0A0C5APZ4	Protein Ycf2	ycf2	Cannabis sativa	IDQILLSLTHSDHLSK	16	0	15	1.84034
Cluster_25128	2	4	1967.93	492.989	12.0625	A0A0C5APZ4	Protein Ycf2	ycf2	Cannabis sativa	KMFHTNGFGSITMGSNVR	18	1	15	2.00305
Cluster_42203	3	2	1826.85	914.434	23.5229	A0A0U2H6B6	Protein Ycf2	ycf2	Humulus lupulus	FLINGGTISPFLFNK	15	0.00138889	12	1.77864
Cluster_38815	2	2	1126.62	564.316	18.7892	Q5TIP9	Putative kinesin heavy chain	kin	Cannabis sativa	SLSKSGNARK	10	2	11	1.53074
Cluster_40353	6	2	1407.61	704.814	16.7025	A0A126WVX7	Putative LOV domain-containing protein	LOV	Cannabis sativa	ASDEKFNKMPQK	12	2	8	1.59936
Cluster_41228	2	2	1573.81	787.913	34.4824	A0A126WVX7	Putative LOV domain-containing protein	LOV	Cannabis sativa	DLTFPSSVQVSLAAR	15	0	11	1.53731
Cluster_42161	4	2	1815.88	908.945	21.4605	A0A126WVX7	Putative LOV domain-containing protein	LOV	Cannabis sativa	EQREITVQLINYTK	14	1	11	1.62619
Cluster_41928	2	2	1753.78	877.899	19.5213	A0A126WVX7	Putative LOV domain-containing protein	LOV	Cannabis sativa	EITVQLINYTKSGK	14	1	12	1.76706
Cluster_40252	2	2	1389.62	695.817	20.2098	A0A126WVX7	Putative LOV domain-containing protein	LOV	Cannabis sativa	HVKNRNLMTSK	11	2	12	1.542
Cluster_40253	3	2	1389.65	695.831	14.9722	A0A126WVX7	Putative LOV domain-containing protein	LOV	Cannabis sativa	HVKNRNLMVSK	11	2	14	1.71868
Cluster_39572	4	2	1261.68	631.847	13.3026	A0A126WVX7	Putative LOV domain-containing protein	LOV	Cannabis sativa	SGRTSLLGPKGK	12	2	14	1.82654
Cluster_42369	5	2	1881.88	941.945	16.7718	A0A126WVX7	Putative LOV domain-containing protein	LOV	Cannabis sativa	EITVQLINYTKSGKK	15	2	14	1.93989
Cluster_41957	2	2	1759.88	880.949	27.4904	A0A126WVX8	Putative LOV domain-containing protein	LOV	Cannabis sativa	CNRGIVEKSTYGTMK	15	2	7	1.62966
Cluster_39903	3	2	1322.66	662.336	12.079	A0A126WVX8	Putative LOV domain-containing protein	LOV	Cannabis sativa	FPGSIPVSLQAK	12	0	9	1.92356
Cluster_40251	2	2	1389.61	695.811	17.1107	A0A126WVX8	Putative LOV domain-containing protein	LOV	Cannabis sativa	HVKNRNLMVSK	11	2	9	1.5245
Cluster_40739	3	2	1478.7	740.358	34.5827	A0A126WVX8	Putative LOV domain-containing protein	LOV	Cannabis sativa	KDSTEQILLQPK	12	1	11	1.66744
Cluster_42298	4	2	1854.82	928.417	21.1151	A0A126WVX8	Putative LOV domain-containing protein	LOV	Cannabis sativa	TSGGDEPASSNVLKGNSR	18	1	11	1.74344
Cluster_41683	2	2	1684.75	843.381	16.0497	A0A126WVX8	Putative LOV domain-containing protein	LOV	Cannabis sativa	DMANSSVNELVQAVK	15	0	12	1.56267
Cluster_40078	3	2	1357.68	679.847	17.8602	A0A126WVX8	Putative LOV domain-containing protein	LOV	Cannabis sativa	SGGGVGIISKNEEK	14	1	15	1.71043
Cluster_33610	2	3	1769.91	590.976	17.1845	A0A126WZD3	Putative LOV domain-containing protein	LOV	Cannabis sativa	TKILMFGGLAKSGNLR	16	2	21	1.55517
Cluster_42409	2	2	1893.93	947.971	26.1618	A0A126X0M1	Putative LOV domain-containing protein	LOV	Cannabis sativa	RSLGQQDHHDAKEENK	16	2	6	1.8096
Cluster_42099	5	2	1796.84	899.426	26.548	A0A126X0M1	Putative LOV domain-containing protein	LOV	Cannabis sativa	MQVEVSKHTEGSKEK	15	2	9	1.61205
Cluster_41369	2	2	1604.84	803.427	24.2248	A0A126X0M1	Putative LOV domain-containing protein	LOV	Cannabis sativa	DSPSWQAFQKILGK	14	1	10	1.68438
Cluster_42087	3	2	1793.82	897.917	27.5011	A0A126X0M1	Putative LOV domain-containing protein	LOV	Cannabis sativa	MQVEVSKHTEGSKEK	15	2	13	1.84166
Cluster_40426	2	2	1420.73	711.372	27.3034	A0A126X1H2	Putative LOV domain-containing protein	LOV	Cannabis sativa	VTQVVETMSDLAK	13	0	6	1.73023
Cluster_42461	5	2	1909.96	955.987	28.7252	A0A126X1H2	Putative LOV domain-containing protein	LOV	Cannabis sativa	KDGTPFWNLLTVTPIK	16	1	9	1.7114
Cluster_42195	4	2	1824.85	913.434	18.0458	A0A126X1H2	Putative LOV domain-containing protein	LOV	Cannabis sativa	TYNILQVTIERQER	14	1	10	1.94712
Cluster_42462	2	2	1909.99	956.003	29.6984	A0A126X1H2	Putative LOV domain-containing protein	LOV	Cannabis sativa	KDGTPFWNLLTVTPIK	16	1	10	1.57143
Cluster_41570	5	2	1656.87	829.443	15.6236	A0A126X1H2	Putative LOV domain-containing protein	LOV	Cannabis sativa	ASIAERTAEWGLVVR	15	1	12	1.73975
Cluster_41256	2	2	1579.65	790.833	24.2075	A0A126X1H2	Putative LOV domain-containing protein	LOV	Cannabis sativa	ALDSMTEVVQTVK	13	0	16	1.63947
Cluster_42378	3	2	1883.84	942.928	30.3132	U6EFF4	Putative LysM domain containing receptor kinase	lyk2	Cannabis sativa	YNPQVPNKDSIITGTR	16	1	12	1.641
Cluster_41010	6	2	1529.82	765.919	25.1208	A0A0C5AS10	Ribosomal protein L14	rpl14	Cannabis sativa	KLMCIRIIGASNR	13	2	6	1.79264
Cluster_42246	3	2	1840.82	921.417	20.1855	A0A0C5AS10	Ribosomal protein L14	rpl14	Cannabis sativa	MIQPQTQLNVADNSGAR	17	0.000694444	16	2.53568
Cluster_42283	2	2	1848.9	925.458	25.6023	A0A0M3ULW5	Ribosomal protein L2	rpl2	Cannabis sativa	SENHEAAGVLGLTEQRR	17	1	11	1.67584
Cluster_33802	2	3	1845.91	616.309	24.5727	A0A0M3ULW5	Ribosomal protein L2	rpl2	Cannabis sativa	GLFSFSSLPGKVDQRK	16	2	17	1.76354
Cluster_40547	5	2	1442.73	722.373	20.2444	A0A0C5ART4	Ribosomal protein S11	rps11	Cannabis sativa	GTPFAAQTAAGNAIR	15	0.000694444	19	2.92477
Cluster_39901	2	2	1322.66	662.337	15.4041	A0A0M5M201	Ribosomal protein S13	rps13	Cannabis sativa	HKYGLPLRGQR	11	2	9	1.59919
Cluster_42417	2	2	1895.96	948.987	39.2555	A0A0M3ULW7	Ribosomal protein S19	rps19	Cannabis sativa	SIWKGSFVDAFLLRMK	16	2	17	1.66285
Cluster_42002	6	2	1771.86	886.939	36.2486	A0A0C5APX8	Ribosomal protein S2	rps2	Cannabis sativa	RQLSHLQTYLGGIK	14	1	11	1.754
Cluster_42700	2	2	1991.01	996.513	27.4165	A0A0M3UM22	Ribosomal protein S3	rps3	Cannabis sativa	MKKVENLYSNYGYPIR	16	2	5	1.72507
Cluster_42317	5	2	1860.92	931.465	28.2034	A0A110BC84	Ribosomal protein S3	rps3	Cannabis sativa	MVLPIGKVIQSFISR	15	1	19	1.95651
Cluster_33354	3	3	1648.85	550.624	15.9341	A0A0M4RG21	Ribosomal protein S4	rps4	Cannabis sativa	LKDLNLLLRSGNGR	14	2	15	1.56722
Cluster_41661	2	2	1678.88	840.445	30.6542	A0A0C5ARU3	Ribosomal protein S7	rps7	Cannabis sativa	TETNPLSVLRQAIR	14	1	9	1.58303
Cluster_40218	2	2	1385.66	693.839	16.3138	A0A0C5ARU3	Ribosomal protein S7	rps7	Cannabis sativa	YIIQYALSKK	10	1	11	1.52486
Cluster_40414	2	2	1417.73	709.872	18.4567	A0A0M4R6T5	Ribosomal protein S7	rps7	Cannabis sativa	MGGLDGEQKQLIK	13	1	10	1.5637
Cluster_37971	4	2	977.481	489.748	23.2117	A0A0B4SX31	Ribulose bisphosphate carboxylase large chain	rbcL	Cannabis sativa	SQSETGEIK	9	0	8	1.79783
Cluster_38006	3	2	984.575	493.295	20.2903	A0A0B4SX31	Ribulose bisphosphate carboxylase large chain	rbcL	Cannabis sativa	ALRLEDLR	8	1	8	1.65937
Cluster_38280	5	2	1033.53	517.771	15.4901	A0A0B4SX31	Ribulose bisphosphate carboxylase large chain	rbcL	Cannabis sativa	DDFIEKDR	8	1	9	1.71921
Cluster_42154	4	2	1813.97	907.995	40.7969	A0A0B4SX31	Ribulose bisphosphate carboxylase large chain	rbcL	Cannabis sativa	LLDVFGLTIEREGELK	16	1	9	2.045
Cluster_40062	2	2	1353.68	677.847	22.3778	A0A0B4SX31	Ribulose bisphosphate carboxylase large chain	rbcL	Cannabis sativa	GYNKASLGLKPK	12	1	10	1.56065
Cluster_37972	3	2	977.475	489.745	11.2425	A0A0B4SX31	Ribulose bisphosphate carboxylase large chain	rbcL	Cannabis sativa	SQSETGEIK	9	0	11	2.07542
Cluster_40861	4	2	1501.84	751.929	17.6481	A0A0B4SX31	Ribulose bisphosphate carboxylase large chain	rbcL	Cannabis sativa	YGRPLLGCTIKPK	13	0	11	2.22792
Cluster_39135	4	2	1186.65	594.331	20.0686	A0A0B4SX31	Ribulose bisphosphate carboxylase large chain	rbcL	Cannabis sativa	DNGLLLHIHR	10	0	12	2.45989
Cluster_39565	4	2	1260.64	631.325	28.0512	A0A0B4SX31	Ribulose bisphosphate carboxylase large chain	rbcL	Cannabis sativa	FLFCAEAIYK	10	0	14	2.54324
Cluster_39633	3	2	1273.69	637.854	36.1008	A0A0B4SX31	Ribulose bisphosphate carboxylase large chain	rbcL	Cannabis sativa	EITLGFVDLLR	11	0	14	2.39484
Cluster_40585	5	2	1449.75	725.882	21.2379	A0A0B4SX31	Ribulose bisphosphate carboxylase large chain	rbcL	Cannabis sativa	DDENVNSQPFMR	12	0	14	2.47527
Cluster_32989	3	3	1462.78	488.599	30.2953	A0A0B4SX31	Ribulose bisphosphate carboxylase large chain	rbcL	Cannabis sativa	TFQGPPHGIQVER	13	0	15	1.77783
Cluster_40512	3	2	1434.78	718.398	21.9385	A0A0B4SX31	Ribulose bisphosphate carboxylase large chain	rbcL	Cannabis sativa	LEDLRIPTSYTK	12	1	16	3.60793
Cluster_41454	3	2	1626.81	814.411	41.0821	A0A0B4SX31	Ribulose bisphosphate carboxylase large chain	rbcL	Cannabis sativa	AVYECLRGGLDFTK	14	1	16	1.9299
Cluster_42018	3	2	1775	888.508	25.0774	A0A0B4SX31	Ribulose bisphosphate carboxylase large chain	rbcL	Cannabis sativa	ALRLEDLRIPTSYTK	15	2	17	3.39836
Cluster_40700	2	2	1471.69	736.854	31.5653	A0A0U2DW50	Ribulose bisphosphate carboxylase large chain	rbcL	Cannabis sativa subsp. sativa	EIKFEFEAMDTL	12	1	11	1.89697
Cluster_42401	2	2	1891.78	946.896	22.6655	A0A0U2DW50	Ribulose bisphosphate carboxylase large chain	rbcL	Cannabis sativa subsp. sativa	DYKLTYYTPEYQTK	14	1	11	1.9908
Cluster_38211	3	2	1020.53	511.274	32.4765	A0A0U2DW50	Ribulose bisphosphate carboxylase large chain	rbcL	Cannabis sativa subsp. sativa	DTDILAAFR	9	0	12	2.56761
Cluster_40339	3	2	1404.55	703.28	26.1288	A0A0U2DW50	Ribulose bisphosphate carboxylase large chain	rbcL	Cannabis sativa subsp. sativa	LTYYTPEYQTK	11	0	12	1.76661
Cluster_41763	4	2	1706.77	854.391	19.702	A0A0U2DW50	Ribulose bisphosphate carboxylase large chain	rbcl	Cannabis sativa subsp. sativa	QTETKASVGFKAGVK	15	2	12	1.591
Cluster_38210	5	2	1020.53	511.271	28.4745	A0A0U2DW50	Ribulose bisphosphate carboxylase large chain	rbcL	Cannabis sativa subsp. sativa	DTDILAAFR	9	0	13	3.07417
Cluster_38753	5	2	1115.58	558.795	18.1028	A0A0U2DW50	Ribulose bisphosphate carboxylase large chain	rbcL	Cannabis sativa subsp. sativa	VALEACVQAR	10	0	13	2.29328
Cluster_40344	2	2	1405.69	703.852	34.0102	A0A0U2DW50	Ribulose bisphosphate carboxylase large chain	rbcL	Cannabis sativa subsp. sativa	LTYYTPEYQTK	11	0	14	2.16587
Cluster_40343	4	2	1405.68	703.848	37.6357	A0A0U2DW50	Ribulose bisphosphate carboxylase large chain	rbcL	Cannabis sativa subsp. sativa	LTYYTPEYQTK	11	0	15	2.77996
Cluster_40342	6	2	1405.68	703.848	20.5409	A0A0U2DW50	Ribulose bisphosphate carboxylase large chain	rbcL	Cannabis sativa subsp. sativa	LTYYTPEYQTK	11	0	16	2.97037
Cluster_41895	5	2	1740.9	871.455	17.8278	A0A0U2DW50	Ribulose bisphosphate carboxylase large chain	rbcL	Cannabis sativa subsp. sativa	NEGRDLAREGNEIIR	15	2	16	2.97232
Cluster_41086	5	2	1545.74	773.875	28.2628	A0A0U2DW50	Ribulose bisphosphate carboxylase large chain	rbcL	Cannabis sativa subsp. sativa	WSPELAAACEVWK	13	0	19	3.8692
Cluster_42146	5	2	1811.87	906.943	22.6649	A0A0U2DW50	Ribulose bisphosphate carboxylase large chain	rbcL	Cannabis sativa subsp. sativa	DYKLTYYTPEYQTK	14	1	19	3.20355
Cluster_40209	3	2	1383.68	692.848	18.6313	A0A172J1X8	Small auxin up regulated protein	SAUR03	Boehmeria nivea	QLIQKPFSNTK	11	0	13	1.91609
Cluster_33570	3	3	1754.89	585.971	28.1796	A0A172J1Z7	Small auxin up regulated protein	SAUR20	Boehmeria nivea	YMKSIFYSQSLLYK	14	1	17	1.66139
Cluster_39295	3	2	1213.63	607.822	13.2783	A0A172J206	Small auxin up regulated protein	SAUR28	Boehmeria nivea	LNVSLDYLAK	10	0	9	1.6
Cluster_40645	4	2	1460.67	731.344	14.3041	A0A172J210	Small auxin up regulated protein	SAUR30	Boehmeria nivea	LLQRSLSNSRK	11	2	10	1.55815
Cluster_42560	3	2	1940.97	971.493	32.2779	A0A172J211	Small auxin up regulated protein	SAUR24	Boehmeria nivea	GHIAVYVGDQFQNKKR	16	2	12	1.58579
Cluster_42218	3	2	1830.82	916.418	25.1515	A0A172J212	Small auxin up regulated protein	SAUR23	Boehmeria nivea	SFSNSSKAASMVLDVPK	17	1	14	1.55154
Cluster_41896	4	2	1740.9	871.457	39.2724	A0A172J219	Small auxin up regulated protein	SAUR40	Boehmeria nivea	SNKLPQTAVIKQILK	15	2	15	1.80522
Cluster_38866	4	2	1135.68	568.845	20.2051	A0A172J226	Small auxin up regulated protein	SAUR48	Boehmeria nivea	KQAVIRDVPK	10	2	9	1.62274
Cluster_38358	5	2	1047.52	524.765	13.1118	A0A172J227	Small auxin up regulated protein	SAUR44	Boehmeria nivea	FCHVDIMK	8	0	9	1.53619
Cluster_34010	2	3	1927.89	643.638	15.7418	A0A172J227	Small auxin up regulated protein	SAUR44	Boehmeria nivea	FVVRATYLNHPMFQK	15	1	22	2.08275
Cluster_41694	4	2	1688.97	845.491	15.5514	A0A172J229	Small auxin up regulated protein	SAUR55	Boehmeria nivea	GYIAVYVGEDQKKR	14	2	10	1.66373
Cluster_42075	2	2	1789.91	895.963	41.2916	A0A172J229	Small auxin up regulated protein	SAUR55	Boehmeria nivea	TLSGLKEAASKPTTVPK	17	1	14	1.52004
Cluster_42066	4	2	1787.94	894.979	36.7688	A0A172J229	Small auxin up regulated protein	SAUR55	Boehmeria nivea	TLSGLKEAASKPTTVPK	17	1	18	1.84406
Cluster_40746	4	2	1480.69	741.352	17.1881	A0A172J236	Small auxin up regulated protein	SAUR58	Boehmeria nivea	KSPLSTSTAADVPK	14	1	13	1.74452
Cluster_41717	2	2	1693.83	847.923	21.7266	A0A172J237	Small auxin up regulated protein	SAUR54	Boehmeria nivea	APTGWLWVSIGGNKK	15	1	6	1.66084
Cluster_42316	5	2	1859.95	930.981	32.1127	A0A172J237	Small auxin up regulated protein	SAUR54	Boehmeria nivea	KNGGISVWLWGTPARR	16	2	6	1.52161
Cluster_41715	2	2	1693.83	847.92	29.5741	A0A172J237	Small auxin up regulated protein	SAUR54	Boehmeria nivea	APTGWLWVSIGGNKK	15	1	8	1.60483
Cluster_41710	4	2	1692.85	847.434	23.9564	A0A172J237	Small auxin up regulated protein	SAUR54	Boehmeria nivea	APTGWLWVSIGGNKK	15	1	9	1.77189
Cluster_41720	2	2	1694.79	848.401	27.7386	A0A172J237	Small auxin up regulated protein	SAUR54	Boehmeria nivea	APTGWLWVSIGGNKK	15	1	9	1.97725
Cluster_41544	5	2	1648.82	825.419	26.4763	A0A172J238	Small auxin up regulated protein	SAUR60	Boehmeria nivea	ANKLPQTAVLKQILK	15	2	10	1.65874
Cluster_42523	3	2	1928.86	965.437	25.9139	A0A172J243	Small auxin up regulated protein	SAUR59	Boehmeria nivea	RSSNSNANQAASNVADVPK	19	1	8	1.6473
Cluster_42524	2	2	1928.96	965.489	27.5286	A0A172J243	Small auxin up regulated protein	SAUR59	Boehmeria nivea	RSSNSNANQAASNVADVPK	19	1	8	1.67888
Cluster_42001	4	2	1771.83	886.923	26.9278	A0A172J243	Small auxin up regulated protein	SAUR59	Boehmeria nivea	SSNSNANQAASNVADVPK	18	0.000694444	11	2.01943
Cluster_42522	2	2	1928.88	965.449	21.3732	A0A172J243	Small auxin up regulated protein	SAUR59	Boehmeria nivea	RSSNSNANQAASNVADVPK	19	1	12	1.72612
Cluster_41941	4	2	1757.81	879.914	24.1451	A0A172J243	Small auxin up regulated protein	SAUR59	Boehmeria nivea	SSNSNANQAASNVADVPK	18	0.00138889	19	1.63248
Cluster_40583	2	2	1448.72	725.366	28.5816	A0A172J249	Small auxin up regulated protein	SAUR70	Boehmeria nivea	TLLMEHAPRKNR	12	2	13	1.6481
Cluster_41489	3	2	1636.73	819.372	20.1302	A0A172J276	Small auxin up regulated protein	SAUR31	Boehmeria nivea	CKSIGSISTLSKSK	14	2	9	1.75495
Cluster_40941	3	2	1514.83	758.422	37.4725	A0A172J2A4	Small auxin up regulated protein	SAUR71	Boehmeria nivea	CRQWTKNILGEK	12	2	9	1.74417
Cluster_42521	3	2	1927.81	964.914	15.6962	A0A172J227	Small auxin up regulated protein	SAUR44	Boehmeria nivea	FVVRATYLNHPMFQK	15	0.0430556	9	1.84576
Cluster_34009	2	3	1928.67	643.897	15.8889	A0A172J227	Small auxin up regulated protein	SAUR44	Boehmeria nivea	FVVRATYLNHPMFQK	15	1	22	1.82585
Cluster_40947	4	2	1516.73	759.371	20.0148	A0A172J241	Small auxin up regulated protein	SAUR52	Boehmeria nivea	SFLNDSNSVPNDVK	14	0.000694444	8	1.65805
Cluster_42233	3	2	1836.91	919.462	19.9876	A0A172J290	Small auxin up regulated protein	SAUR51	Boehmeria nivea	TISGVKEAALKSTNIPK	17	0.0430556	12	1.56642
Cluster_41847	7	2	1728.83	865.423	36.4103	Q5TIQ0	Small ubiquitin-related modifier	smt3	Cannabis sativa	GDFLFAISNFEVSQR	15	0.000694444	11	1.91694
Cluster_40280	3	2	1394.7	698.358	18.9089	Q5TIQ0	Small ubiquitin-related modifier	smt3	Cannabis sativa	VKGQDGNEVFFR	12	1	14	2.7412
Cluster_41009	2	2	1528.8	765.407	22.4343	A0A1V0QSF2	Terpene synthase	TPS	Cannabis sativa	YLLDMVRALNLAR	13	1	10	1.85754
Cluster_40501	4	2	1433.76	717.887	19.3248	A0A1V0QSF3	Terpene synthase	TPS	Cannabis sativa	ELNKRVVTYWK	11	2	7	1.66258
Cluster_42266	3	2	1844.97	923.491	35.6186	A0A1V0QSF3	Terpene synthase	TPS	Cannabis sativa	AIVANSKDHPLSHQISK	17	1	11	2.08305
Cluster_41018	4	2	1530.81	766.413	37.1998	A0A1V0QSF3	Terpene synthase	TPS	Cannabis sativa	DASHNKLLLELAK	13	1	14	1.52301
Cluster_42051	3	2	1785.82	893.917	27.9229	A0A1V0QSF4	Terpene synthase	TPS	Cannabis sativa	SNSLAQLEFIDALQR	15	0.000717593	15	1.81898
Cluster_40495	2	2	1433.75	717.885	23.2512	A0A1V0QSF6	Terpene synthase	TPS	Cannabis sativa	LDFNLLQCFHK	11	0	10	1.65443
Cluster_40869	4	2	1503.74	752.878	19.3048	A0A1V0QSF8	Terpene synthase	TPS	Cannabis sativa	LADDLGTSSDELNR	14	0	12	2.59528
Cluster_42060	2	2	1786.99	894.503	24.7085	A0A1V0QSF8	Terpene synthase	TPS	Cannabis sativa	ERISTLIITPINIPK	15	1	13	1.59151
Cluster_42292	4	2	1852.86	927.435	26.133	A0A1V0QSF9	Terpene synthase	TPS	Cannabis sativa	TSIITSISKPKSKPK	15	1	23	2.02874
Cluster_40245	5	2	1388.72	695.369	20.9599	A0A1V0QSG0	Terpene synthase	TPS	Cannabis sativa	LVDDLGTSSDELK	13	0	11	1.88744
Cluster_41053	2	2	1537.83	769.923	21.027	A0A1V0QSG1	Terpene synthase	TPS	Cannabis sativa	LLISETWKLINK	12	1	10	2.098
Cluster_41608	2	2	1666.69	834.35	26.8116	A0A1V0QSG6	Terpene synthase	TPS	Cannabis sativa	QYGVSEQEACDELR	14	0	10	1.51431
Cluster_41981	4	2	1766.79	884.4	26.2125	A0A1V0QSG6	Terpene synthase	TPS	Cannabis sativa	MSYQVLASSQNDKVSK	16	1	10	1.60515
Cluster_33819	2	3	1853.87	618.963	19.3871	A0A1V0QSF9	Terpene synthase	TPS	Cannabis sativa	TSIITSISKPKSKPK	15	1	27	1.94295
Cluster_41249	5	2	1578.76	790.388	26.8221	A0A1V0QSG6	Terpene synthase	TPS	Cannabis sativa	LGLSYHFENEIEK	13	0.000694444	9	1.58622
Cluster_39920	5	2	1324.75	663.382	18.154	A0A1V0QSH1	Terpene synthase	TPS	Cannabis sativa	FSYFRTKTAK	10	0.0430556	13	1.506
Cluster_42226	4	2	1833.92	917.967	35.3136	A0A0H3UZT7	Tetrahydrocannabinolic acid synthase	THCAS	Cannabis sativa	SAGQKVAFSIKLDYVK	16	2	11	1.7156
Cluster_39134	3	2	1186.66	594.337	22.4015	Q33DP7	Tetrahydrocannabinolic acid synthase	THCAS	Cannabis sativa	KNMEIRGLVK	10	2	9	1.65612
Cluster_38680	4	2	1102.58	552.299	12.6196	Q8GTB6	Tetrahydrocannabinolic acid synthase	THCAS	Cannabis sativa	HIPNNVANPK	10	0	8	1.70198
Cluster_42228	5	2	1834.79	918.402	26.5442	Q8GTB6	Tetrahydrocannabinolic acid synthase	THCAS	Cannabis sativa	SVYNFTTPYVSQNPR	15	0.000694444	11	1.686
Cluster_41904	2	2	1744.86	873.436	27.0827	Q8GTB6	Tetrahydrocannabinolic acid synthase	THCAS	Cannabis sativa	KVSFITSKSPVAVLK	15	2	12	1.59346
Cluster_41837	4	2	1726.79	864.403	15.41	Q8GTB6	Tetrahydrocannabinolic acid synthase	THCAS	Cannabis sativa	LVVVPSKATIFSVK	14	1	17	1.64454
Cluster_42555	4	2	1940.96	971.489	18.8421	A0A1V0IS79	Uncharacterized protein	unknown	Cannabis sativa	KDIKEILQYNNSWTK	15	2	8	1.50347
Cluster_41695	2	2	1689.72	845.868	19.2792	A0A1V0IS79	Uncharacterized protein	unknown	Cannabis sativa	YQYQFVSRLKSK	12	2	19	1.63481
Cluster_42179	2	2	1820.88	911.448	22.8764	L0N5C8	Uncharacterized protein	unknown	Cannabis sativa	IYNKWQNTAYKFDK	14	2	9	1.65981
